# Supplementary material for: Bis(N-acylated imidazolin-2-imine) nickel catalyzed norbornene copolymerization with methyl acrylate
Source: Royal Society of Chemistry journal article supplement (doi:10.1039/d0py00857e), 2020-01-01
Supplement: d0py00857e1.pdf [file d0py00857e1.pdf]

## Electronic Supplementary Information

# **Bis(*N*-acylated imidazolin-2-imine) Nickel Catalyzed Norbornene Copolymerization with Methyl Acrylate**

Yanqing Li<sup>a, b</sup>, Hu Zhang<sup>a</sup>, Ru Xiao<sup>a\*</sup> and Zhengguo Cai<sup>a\*</sup>

<sup>a</sup> State Key Laboratory for Modification of Chemical Fibers and Polymer Materials, College of Materials Science and Engineering, Donghua University, Shanghai 201620, P. R. China

<sup>b</sup> College of Biological and Chemical Engineering, Guangxi University of Science and Technology, Liuzhou 545006, P. R. China

## Contents

|                                                                                                          |    |
|----------------------------------------------------------------------------------------------------------|----|
| <b>1. Synthetic Procedure</b> .....                                                                      | 1  |
| 1.1 Synthesis of <i>N</i> -acylated imidazolin-2-imine ligands (L1-L4) and NMR spectra of compounds..... | 1  |
| 1.2 <sup>1</sup> H NMR spectra of nickel complexes .....                                                 | 12 |
| <b>2. Crystal data and structure refinement for complexes Ni1-Ni4</b> .....                              | 14 |
| <b>3. NMR spectra, GPC curves and DSC curves of NB-HAc copolymers</b> .....                              | 16 |
| 3.1. Microstructure of NB-HAc copolymer .....                                                            | 16 |
| 3.2. HAc incorporation in NB-HAc copolymers obtained by Ni1-Ni4 .....                                    | 17 |
| 4.3. GPC curves of NB-HAc copolymers .....                                                               | 19 |
| 3.4. DSC curves of NB-HAc copolymers .....                                                               | 20 |
| <b>4. NMR spectra, GPC curves and DSC curves of NB-AAc copolymers</b> .....                              | 22 |
| 4.1. Microstructure of NB-AAc copolymer .....                                                            | 22 |
| 4.2. AAc incorporation in NB-AAc copolymers obtained by Ni1-Ni4 .....                                    | 23 |
| 4.3. GPC curves of NB-AAc copolymers .....                                                               | 25 |
| 4.4. DSC curves of NB-AAc copolymers .....                                                               | 26 |
| <b>5. NMR spectra, GPC curves and DSC curves of NB-MA copolymers</b> .....                               | 28 |
| 5.1. Microstructure of NB-MA copolymer .....                                                             | 28 |
| 5.2. MA incorporation in NB-MA copolymers obtained by Ni1-Ni4.....                                       | 29 |
| 5.3. GPC curves of NB-MA copolymers .....                                                                | 33 |
| 5.4. DSC curves of NB-MA copolymers .....                                                                | 33 |

# 1. Synthetic Procedure

## 1.1 Synthesis of *N*-acylated imidazolin-2-imine ligands (L1-L4) and NMR spectra of compounds

### Scheme S1. Synthesis of Mono-substituted *N*-acylated imidazolin-2-imine Ligands (L1-L2)

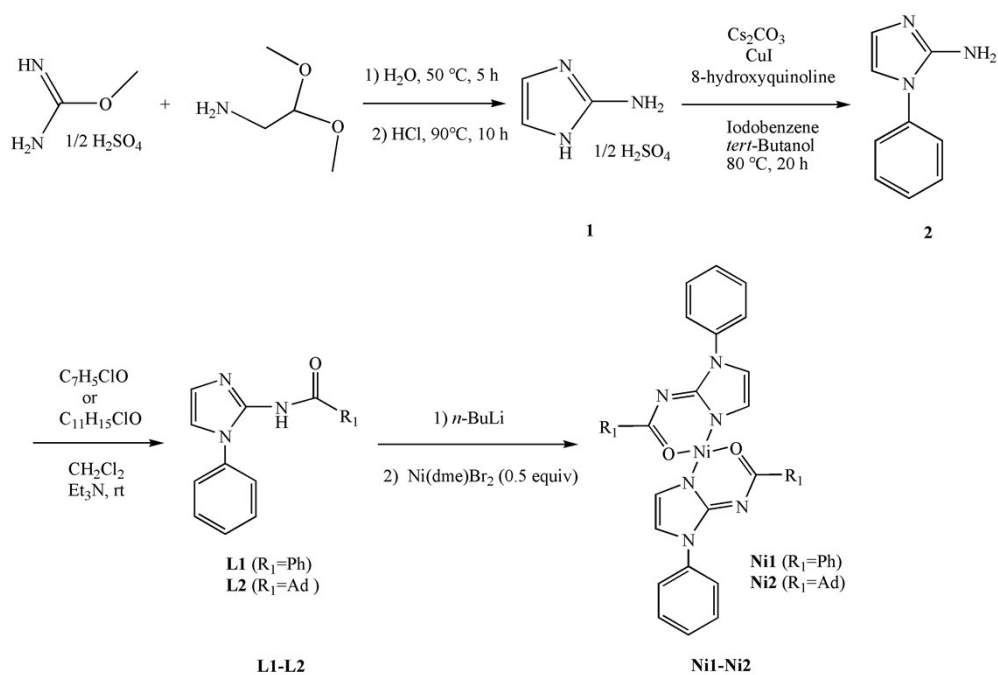

### Scheme S2. Synthesis of Bis-substituted *N*-acylated imidazolin-2-imine Ligands (L3-L4)

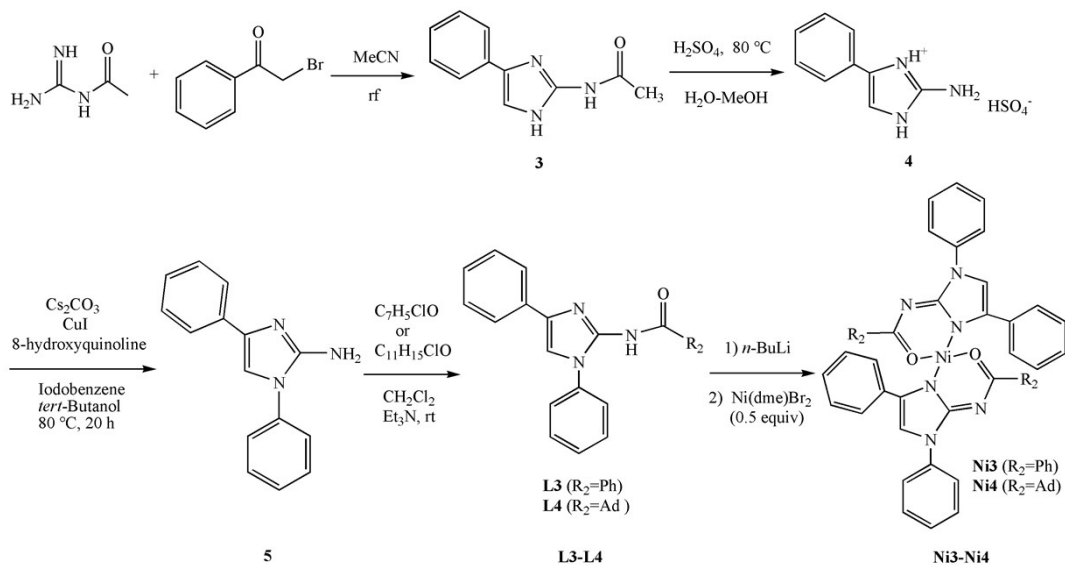

**Synthesis of 2-amino-1*H*-imidazole hemisulfate (1):** A 250 mL two-neck flask was charged with 2-aminoacetaldehyde dimethyl acetal (5.56 mL, 50 mmol), *O*-methylisourea hemisulfate (6.25 g, 50 mmol) and 30 mL water, and stirred for 1 h at room temperature. The temperature was then elevated up to 50 °C and kept for 5 h. Subsequently, the 10 mL of concentrated hydrochloric acid was introduced, and the mixture was heated to 90 °C for another 10 h. The solvent was evaporated, and the solid was dissolved in a mixed solution of ethanol and water (volume ratio, 1:1) and crystallized under minus 20 degrees Celsius to get a white crystal (4.95 g, 37.46 mmol, 74.92%). <sup>1</sup>H NMR (D<sub>2</sub>O, δ, ppm): 6.73 (s, 2H, =CH). <sup>13</sup>C NMR (D<sub>2</sub>O, δ, ppm): 146.55, 112.83.

**Synthesis of 1-phenyl-1*H*-imidazol-2-amine (2):** 2-Amino-1*H*-imidazole hemisulfate (5.29 g, 40 mmol) was dissolved in H<sub>2</sub>O and neutralized with 1 mol/L NaOH, and dried under vacuum. The precipitate was collected and mixed with Cs<sub>2</sub>CO<sub>3</sub> (19.75 g, 60 mmol), CuI (0.78 g, 4 mmol) and 8-hydroxyquinoline (0.89 g, 6 mmol), and anhydrous *t*-BuOH (80 mL), and iodobenzene (4.55 mL, 40 mmol) were injected in turn into the mixture solution. The solution was heated up to 80 °C and maintained with stirring. After 20 h, the solvent was removed under vacuum, and the product was extracted using EtOAc (3×50 mL) and the organic layer was filtered through a 0.45 μm millipore membrane filter. The EtOAc was evaporated in vacuo, the crude products were purified by recrystallization in a mixture of toluene and hexane (4.58 g, 28.81 mmol, 72.02%). <sup>1</sup>H NMR (DMSO, δ, ppm): 7.46-7.50 (m, 5H, =CH, -NH), 7.36 (t, 1H, =CH), 6.93 (s, 1H, =CH), 6.63 (s, 1H, =CH), 5.46 (s, 2H, -

NH<sub>2</sub>). <sup>13</sup>C NMR (DMSO, δ, ppm): 149.57, 138.05, 130.03, 127.17, 125.37, 124.38, 116.32.

**Synthesis of 2-acetamido-4-phenyl-1*H*-imidazole (3).** A 250 mL oven-dried flask was charged with 2-bromoacetophenone (4.02 g, 20 mmol) and 1-acetylguanidine (6.19 g, 60 mmol) in 40 mL acetonitrile, and the solution was then refluxed at 85 °C for 19 h. As the reaction was complete, the solvent was removed under vacuum. Purification of the resulting material by recrystallization in a mixture of THF and hexane afforded a white solid (1.35 g, 6.71 mmol, 33.55%). <sup>1</sup>H NMR (DMSO, δ, ppm): 11.64 (s, 1H, -NH), 11.28 (s, 1H, -NH), 7.64 (d, 2H, =CH), 7.54 (bs, 2H, -NH<sub>2</sub>), 7.45 (t, 2H, =CH), 7.43 (s, 1H, =CH), 7.34 (t, 1H, =CH). <sup>13</sup>C NMR (DMSO, δ, ppm): 148.24, 129.42, 128.42, 128.18, 126.89, 124.50, 110.02.

**Synthesis of 2-amino-4-phenyl-1*H*-imidazole sulfate (4).** 2-Acetamido-4-phenyl-1*H*-imidazole (2.01 g, 10 mmol) was dissolved in a mixture solution of methanol and water (60 mL, volume ratio=1:1), and 0.60 mL of concentrated sulfuric acid was added. The mixture solution was subsequently heated and stirred at 100 °C for 16 h. After cooling to 0 °C, the colorless crystal was obtained at high yield (2.47 g, 9.60 mmol, 96.01%). <sup>1</sup>H NMR (DMSO, δ, ppm): 12.68 (s, 1H, -NH), 12.06 (s, 1H, -NH), 7.64 (D, 2H, =CH), 7.32 (t, 2H, =CH), 7.26 (s, 1H, =CH), 7.16 (t, 1H, =CH), 2.07 (s, 3H, -CH<sub>3</sub>). <sup>13</sup>C NMR (DMSO, δ, ppm): 169.01, 141.72, 136.54, 135.14, 128.87, 126.34, 124.40, 109.67, 23.28.

**Synthesis of 1,4-diphenyl-1*H*-imidazol-2-amine (5).** 1,4-Diphenyl-1*H*-imidazol-2-amine was synthesized in a similar method producing 1-phenyl-1*H*-imidazol-2-amine.

The general procedure using 2-amino-4-phenyl-1*H*-imidazole sulfate (2.57, 10 mmol) provided a white solid that crystallized from CH<sub>2</sub>Cl<sub>2</sub> to yield a colorless crystal (1.28 g, 5.44 mmol, 54.40%). <sup>1</sup>H NMR (CDCl<sub>3</sub>, δ, ppm): 7.74 (d, 2H, =CH), 7.54 (t, 2H, =CH), 7.48 (d, 2H, =CH), 7.43 (t, 1H, =CH), 7.38 (t, 2H, =CH), 7.24 (t, 2H, =CH), 7.06 (bs, 2H, -NH<sub>2</sub>). <sup>13</sup>C NMR (CDCl<sub>3</sub>, δ, ppm): 147.55, 137.73, 136.89, 133.93, 129.98, 128.55, 127.97, 126.56, 124.65, 124.43, 111.47.

**Synthesis of *N*-(1-phenyl-1*H*-imidazol-2-yl)benzamide ligand (L1).** 1-Phenyl-1*H*-imidazol-2-amine (1.59 g, 10 mmol) was dissolved in dichloromethane (60 mL) in a 250 mL flask and triethylamine (1.50 mL, 11 mmol) was added, and then benzoyl chloride (1.16 mL, 10 mmol) was injected with a syringe. After stirring for 10 h at 25 °C, the mixture solution was removed under vacuum. The crude product was purified by silica gel column chromatography (eluent: EtOAc/Hexane=1:3) to give **L1** (2.03 g, 77%). <sup>1</sup>H NMR (CDCl<sub>3</sub>, δ, ppm): 12.61 (brs, 1H, -NH), 8.22 (d, 2H, =CH), 7.71 (d, 2H, =CH), 7.54 (t, 2H, =CH), 7.46 (t, 1H, =CH), 7.40 (q, 4H, =CH), 6.88 (d, 2H, =CH). <sup>13</sup>C NMR (CDCl<sub>3</sub>, δ, ppm): 174.57, 149.75, 137.85, 136.60, 130.90, 129.18, 128.87, 127.92, 127.61, 124.59, 114.87, 113.16.

**Synthesis of *N*-(1-phenyl-1*H*-imidazol-2-yl) adamantanecarboxamide ligand (L2).**

**L2** was synthesized in a similar way to that for **L1** in 71% yield. <sup>1</sup>H NMR (DMSO, δ, ppm): 9.44 (s, 1H, -NH), 7.48 (t, 2H, =CH), 7.36-7.40 (m, 4H, =CH), 6.99 (s, 1H, =CH), 1.94 (s, 3H, -CH<sub>2</sub>), 1.70 (s, 6H, -CH), 1.65 (q, 6H, -CH<sub>2</sub>). <sup>13</sup>C NMR (DMSO, δ, ppm): 178.06, 138.44, 137.23, 129.53, 128.08, 126.85, 124.75, 121.00, 40.67, 38.70, 36.43, 27.96.

**Synthesis of *N*-(1,4-diphenyl-1*H*-imidazol-2-yl)benzamide ligand (L3).** L3 was synthesized in a similar way to that for L1 in 63% yield. <sup>1</sup>H NMR (CDCl<sub>3</sub>, δ, ppm): 7.83 (d, 2H, =CH), 7.67 (d, 4H, =CH), 7.47 (t, 2H, =CH), 7.42 (t, 2H, =CH), 7.39 (t, 2H, =CH), 7.34 (s, 1H, -NH), 7.33 (d, 2H, =CH), 7.19 (d, 2H, =CH). <sup>13</sup>C NMR (DMSO, δ, ppm): 171.95, 141.13, 138.95, 135.55, 133.58, 133.46, 132.80, 129.60, 129.29, 128.91, 128.61, 128.40, 127.31, 125.08, 125.02, 116.23.

**Synthesis of *N*-(1,4-diphenyl-1*H*-imidazol-2-yl)adamantanecarboxamide ligand (L4).** L4 was synthesized in a similar way to that for L1 in 66% yield. <sup>1</sup>H NMR (CDCl<sub>3</sub>, δ, ppm): 11.04 (b, 1H, -NH), 7.90 (s, 2H, =CH), 7.49 (t, 1H, =CH), 7.42 (t, 2H, =CH), 7.33 (s, 3H, =CH), 6.78 (s, 2H, =CH), 1.97 (s, 3H, -CH), 1.77 (s, 6H, -CH<sub>2</sub>), 1.68 (q, 6H, -CH<sub>2</sub>). <sup>13</sup>C NMR (DMSO, δ, ppm): 169.85, 158.54, 130.73, 130.53, 129.77, 129.72, 128.51, 128.39, 127.18, 126.76, 102.17, 99.37, 43.94, 38.90, 36.69, 28.17.

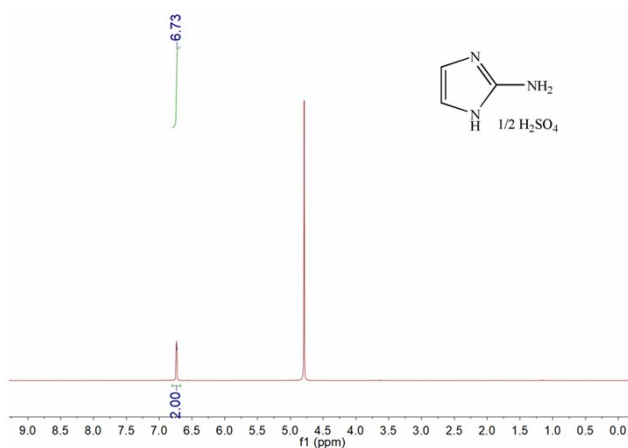

**Figure S1-1.** <sup>1</sup>H NMR spectrum of compound 1 in D<sub>2</sub>O

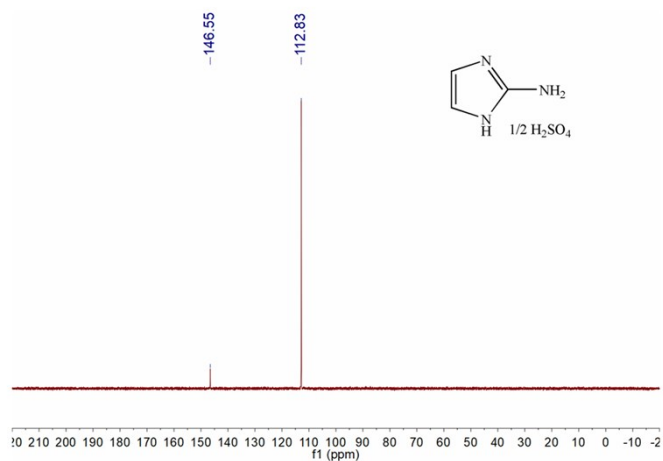

**Figure S1-2.**  $^{13}\text{C}$  NMR spectrum of compound **1** in  $\text{D}_2\text{O}$

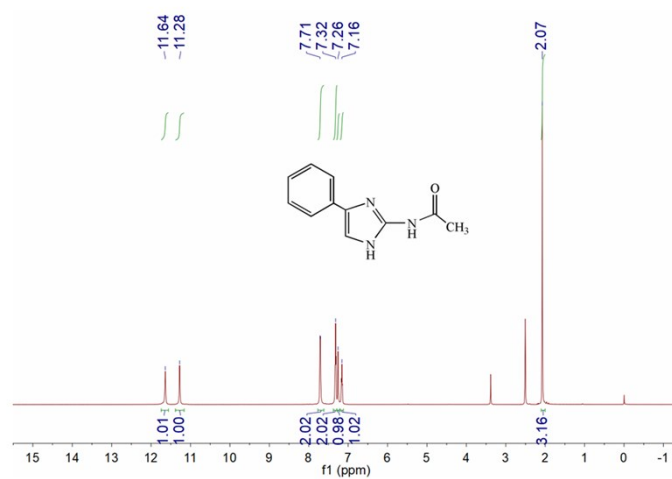

**Figure S1-3.**  $^1\text{H}$  NMR spectrum of compound **2** in DMSO

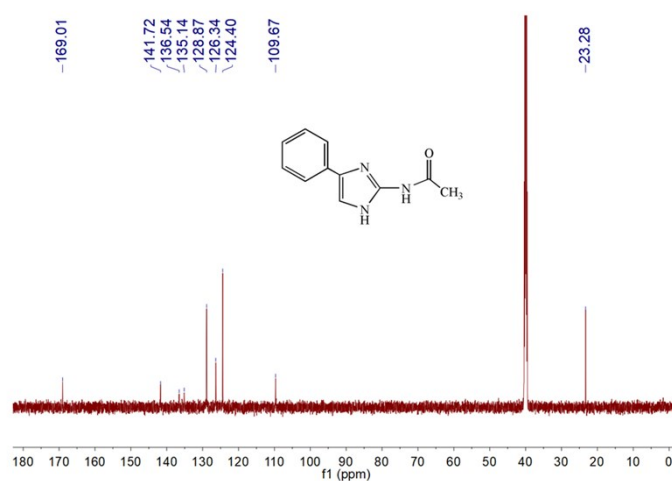

**Figure S1-4.**  $^{13}\text{C}$  NMR spectrum of compound **2** in DMSO



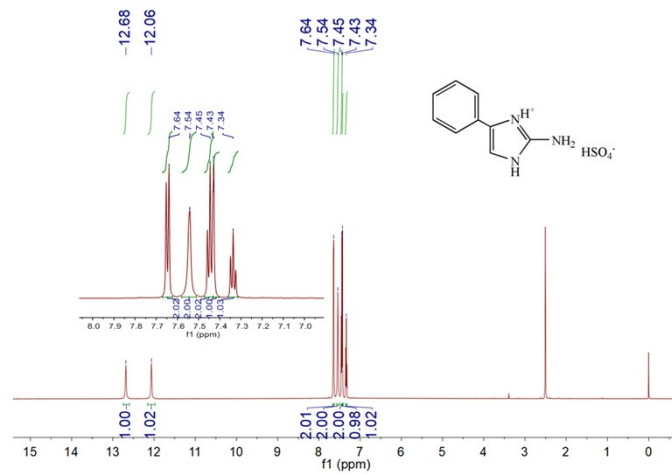

Figure S1-5.  $^1\text{H}$  NMR spectrum of compound **3** in DMSO

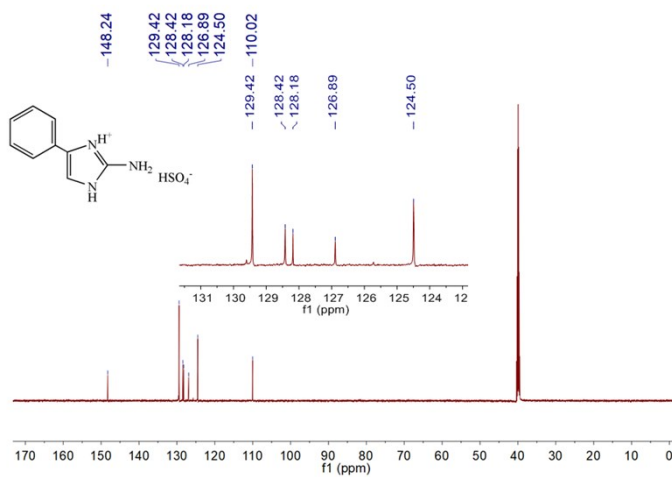

Figure S1-6.  $^{13}\text{C}$  NMR spectrum of compound **3** in DMSO

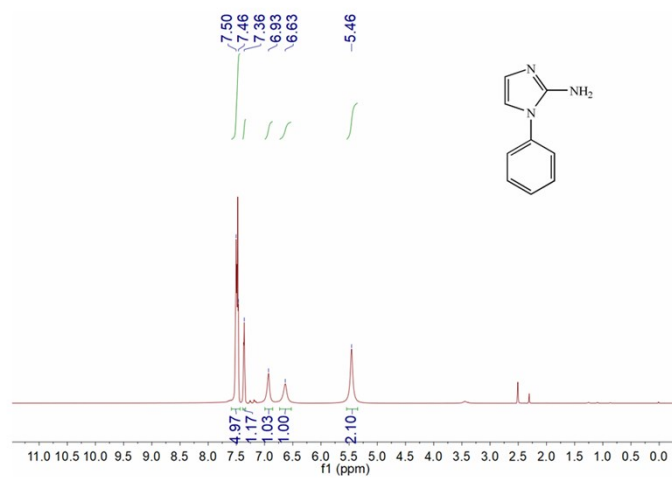

Figure S1-7.  $^1\text{H}$  NMR spectrum of compound **4a** in DMSO

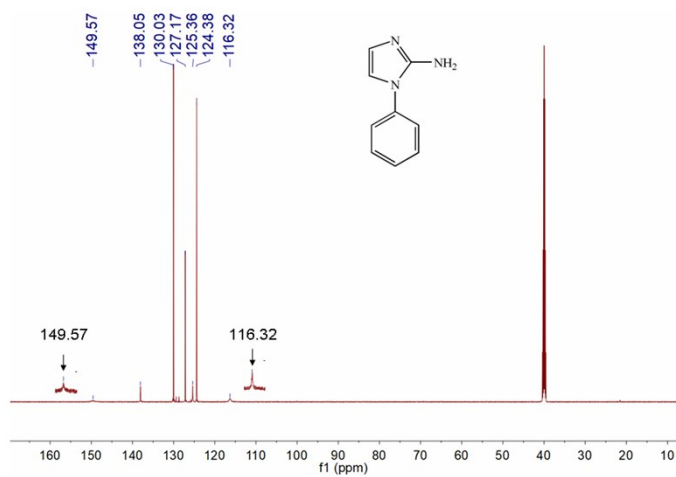

**Figure S1-8.**  $^{13}\text{C}$  NMR spectrum of compound **4a** in DMSO

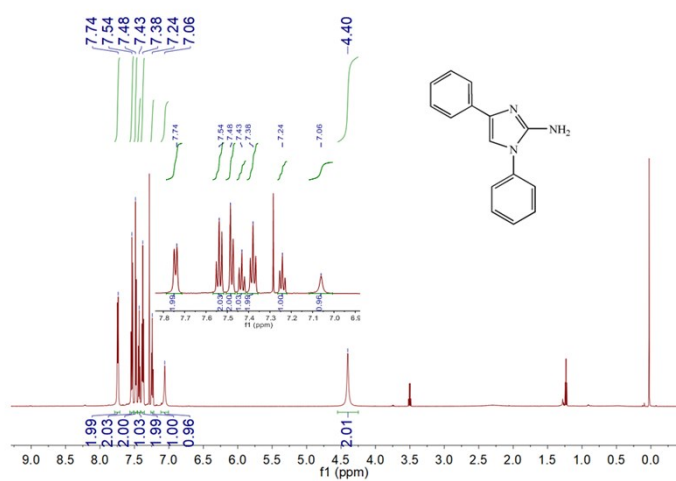

**Figure S1-9.**  $^1\text{H}$  NMR spectrum of compound **4b** in  $\text{CDCl}_3$

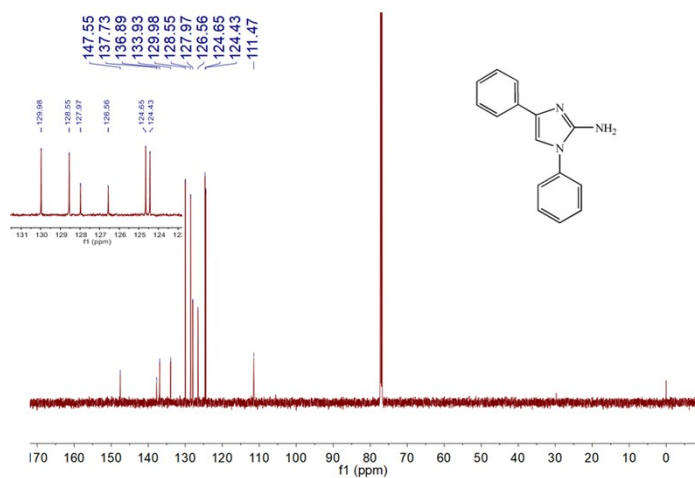

**Figure S1-10.**  $^{13}\text{C}$  NMR spectrum of compound **4b** in  $\text{CDCl}_3$

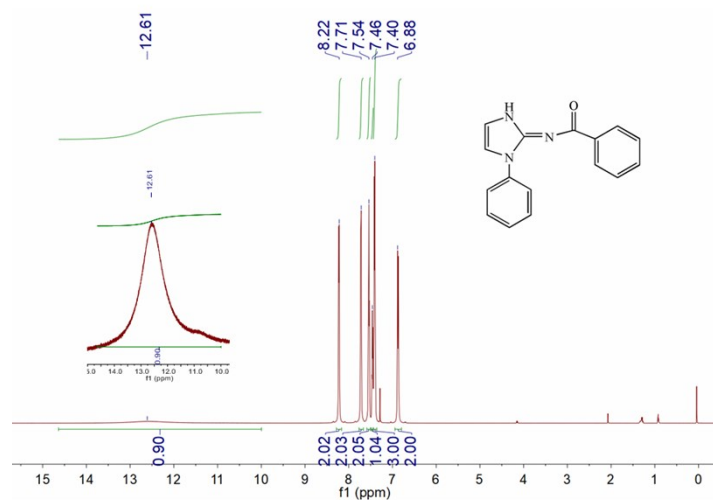

Figure S1-11. <sup>1</sup>H NMR spectrum of compound L1 in CDCl<sub>3</sub>

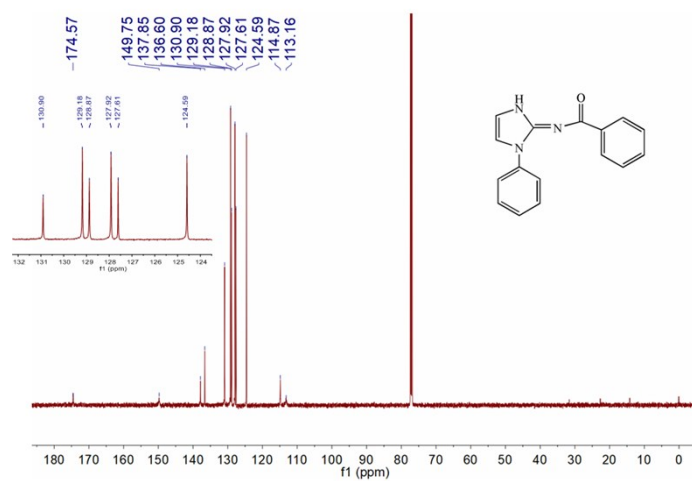

Figure S1-12. <sup>13</sup>C NMR spectrum of compound L1 in CDCl<sub>3</sub>

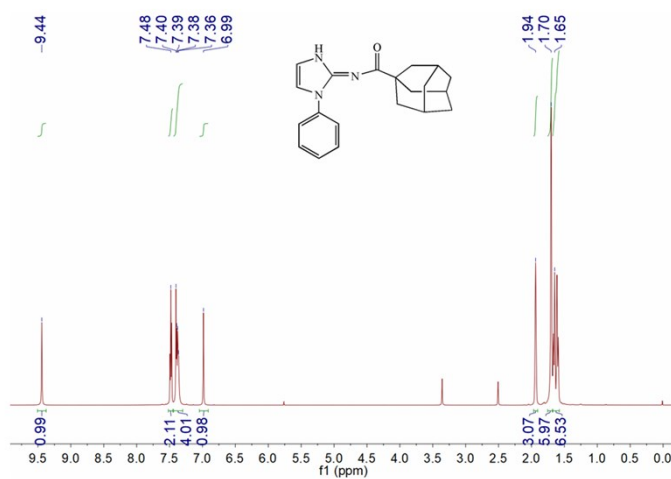

Figure S1-13. <sup>1</sup>H NMR spectrum of compound L2 in CDCl<sub>3</sub>

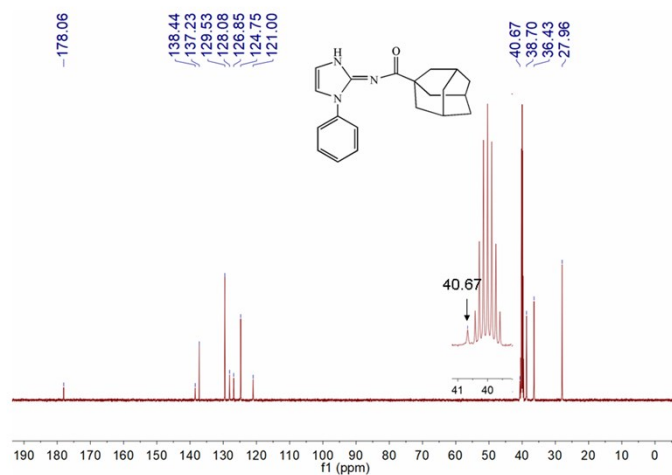

Figure S1-14.  $^{13}\text{C}$  NMR spectrum of compound L2 in  $\text{CDCl}_3$

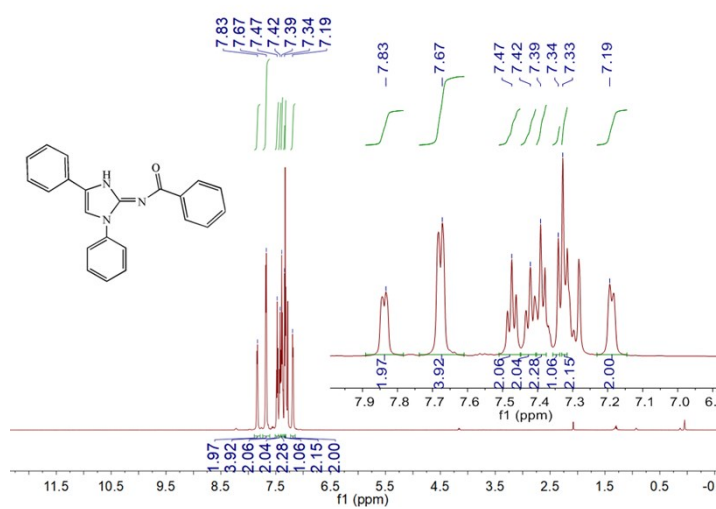

Figure S1-15.  $^1\text{H}$  NMR spectrum of compound L3 in  $\text{CDCl}_3$

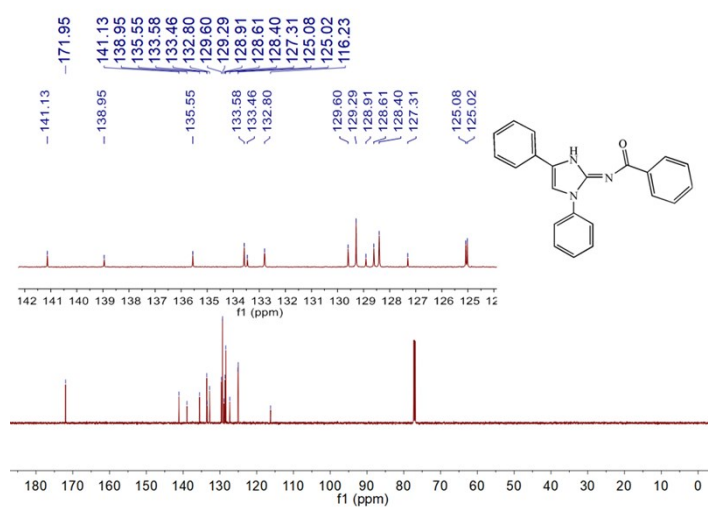

Figure S1-16.  $^{13}\text{C}$  NMR spectrum of compound L3 in  $\text{CDCl}_3$

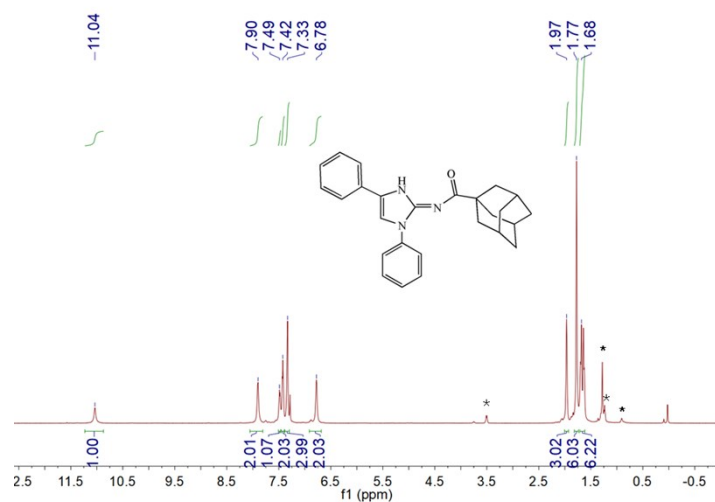

**Figure S1-17.**  $^1\text{H}$  NMR spectrum of compound **L4** in  $\text{CDCl}_3$  (\* - H grease; ☆ - diethyl ether)

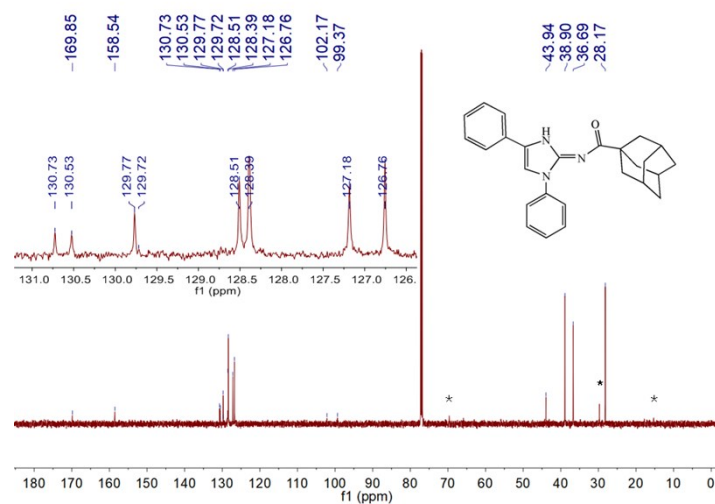

**Figure S1-18.**  $^{13}\text{C}$  NMR spectrum of compound **L4** in  $\text{CDCl}_3$  (\* - H grease; ☆ - diethyl ether)

## 1.2 $^1\text{H}$ NMR spectra of nickel complexes

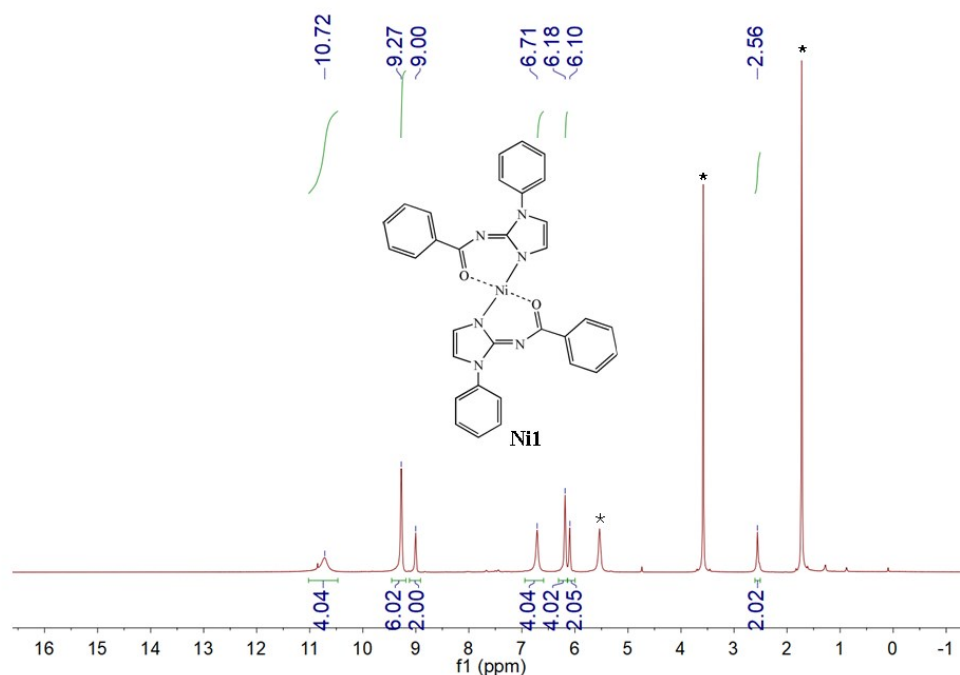

**Figure S1-19.**  $^1\text{H}$  NMR spectrum of complex **Ni1** in  $\text{THF-}d_8$  (\* -  $\text{THF-}d_8$ ; \* -  $\text{CH}_2\text{Cl}_2$ )

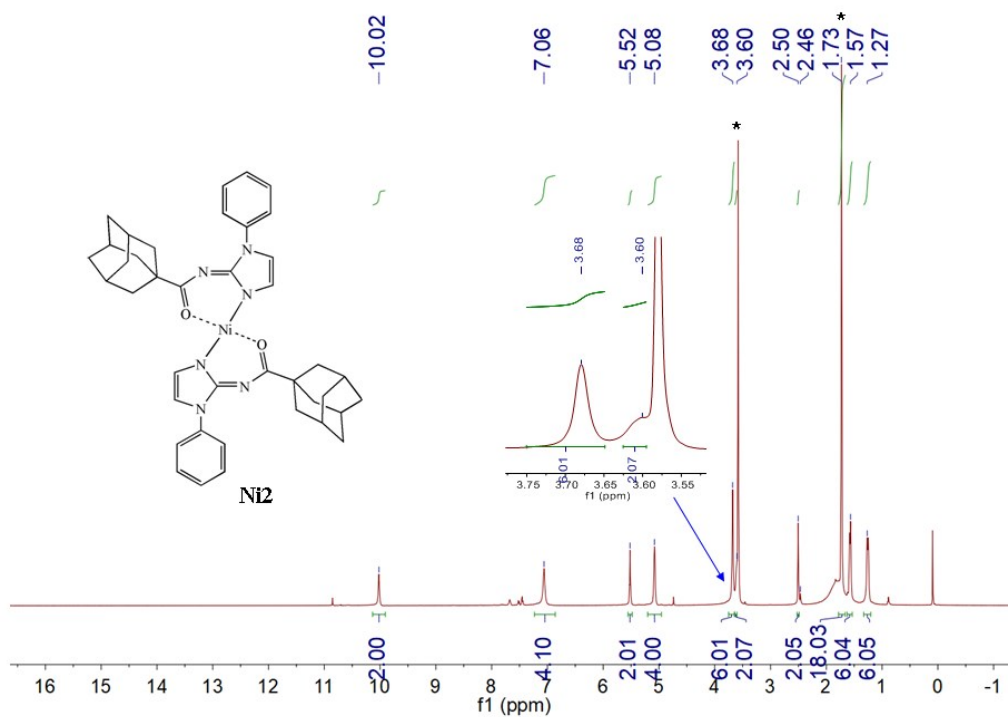

**Figure S1-20.**  $^1\text{H}$  NMR spectrum of complex **Ni2** in  $\text{THF-}d_8$  (\* -  $\text{THF-}d_8$ )

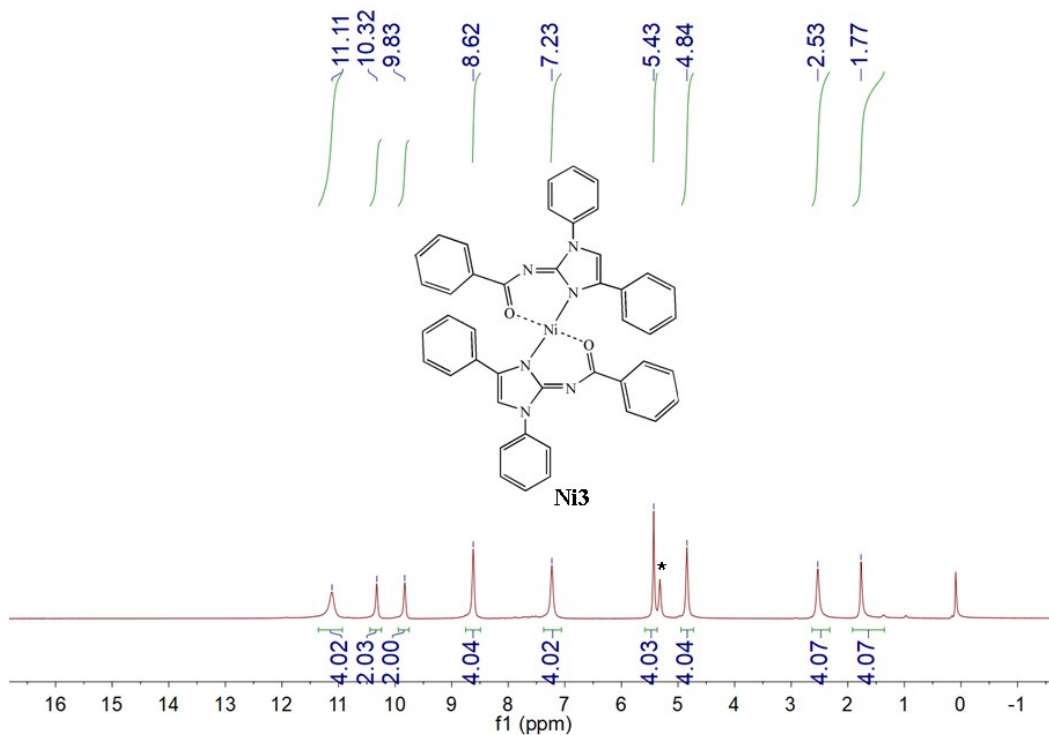

**Figure S1-21.**  $^1\text{H}$  NMR spectrum of complex Ni3 in  $\text{CD}_2\text{Cl}_2$  (\* -  $\text{CD}_2\text{Cl}_2$ )

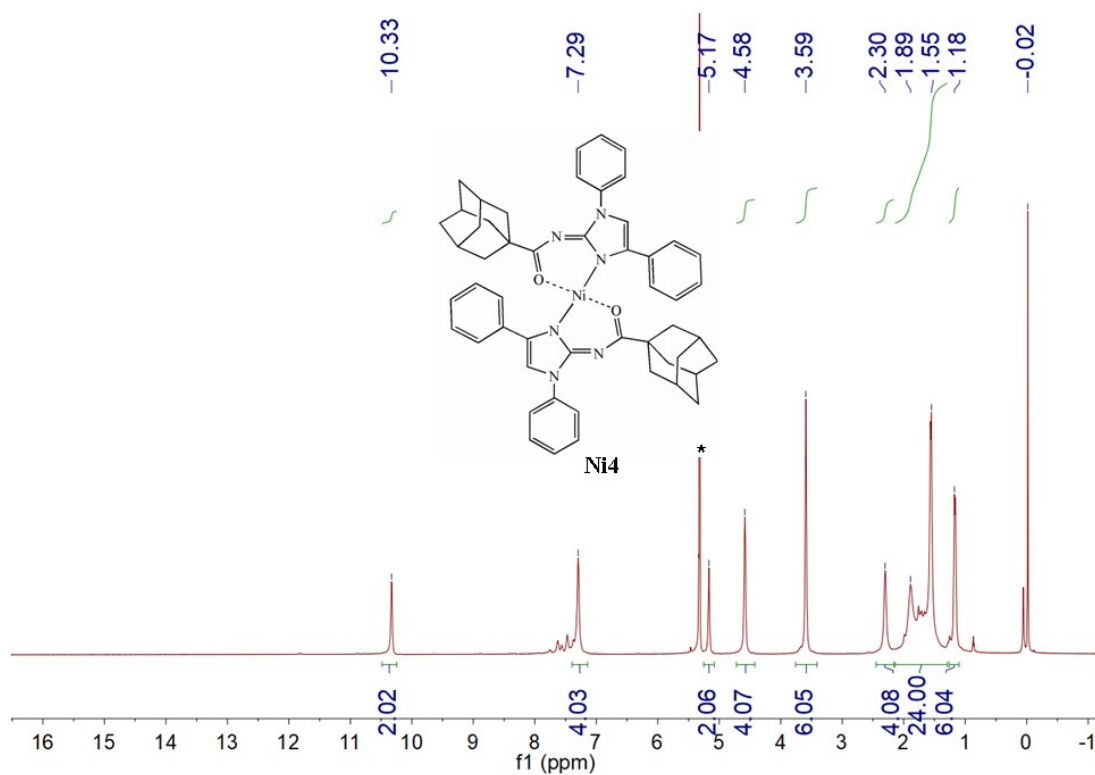

**Figure S1-22.**  $^1\text{H}$  NMR spectrum of complex Ni4 in  $\text{CD}_2\text{Cl}_2$  (\* -  $\text{CD}_2\text{Cl}_2$ )

## 2. Crystal data and structure refinement for complexes Ni1-Ni4

**Table S1.** Crystal data and structure refinement for complexes Ni1-Ni4

|                                                  | Ni1                                                             | Ni2                                                             |
|--------------------------------------------------|-----------------------------------------------------------------|-----------------------------------------------------------------|
| Empirical formula                                | C <sub>32</sub> H <sub>24</sub> N <sub>6</sub> NiO <sub>2</sub> | C <sub>40</sub> H <sub>44</sub> N <sub>6</sub> NiO <sub>2</sub> |
| Formula weight                                   | 583.28                                                          | 699.52                                                          |
| Temperature (K)                                  | 170.01                                                          | 170.03                                                          |
| Wavelength (Å)                                   | 1.34139                                                         | 1.34139                                                         |
| Crystal system                                   | Triclinic                                                       | Triclinic                                                       |
| Space group                                      | P-1                                                             | P-1                                                             |
| a (Å)                                            | 5.41180(10)                                                     | 6.3174(2)                                                       |
| b (Å)                                            | 15.0266(2)                                                      | 10.7495(3)                                                      |
| c (Å)                                            | 15.9498(3)                                                      | 12.7292(4)                                                      |
| α (°)                                            | 91.1300(10)                                                     | 74.886(2)                                                       |
| β (°)                                            | 96.7910(10)                                                     | 79.406(2)                                                       |
| γ (°)                                            | 92.6390(10)                                                     | 89.242(2)                                                       |
| Volume (Å <sup>3</sup> )                         | 1286.17(4)                                                      | 819.75(4)                                                       |
| Z                                                | 2                                                               | 1                                                               |
| Density (calculated) (Mg/m <sup>3</sup> )        | 1.506                                                           | 1.417                                                           |
| Absorption coefficient (mm <sup>-1</sup> )       | 4.438                                                           | 3.540                                                           |
| F(000)                                           | 604                                                             | 370                                                             |
| Crystal size (mm <sup>3</sup> )                  | 0.05×0.015×0.005                                                | 0.08×0.01×0.005                                                 |
| Theta range for data collection (°)              | 4.860 to 54.943                                                 | 5.491 to 54.961                                                 |
| Index ranges                                     | -6≤h≤6, -18≤k≤18, -17≤l≤19                                      | -7≤h≤7, -12≤k≤13, 0≤l≤15                                        |
| Reflections collected                            | 15594                                                           | 3022                                                            |
| Independent reflections                          | 4872 [R(int) = 0.0355]                                          | 3022 [R(int) = 0.0580]                                          |
| Completeness to theta = 26.000°                  | 99.4 %                                                          | 98.6 %                                                          |
| Absorption correction                            | Semi-empirical from equivalents                                 | Semi-empirical from equivalents                                 |
| Max. and min. transmission                       | 0.7508 and 0.6187                                               | 0.7508 and 0.5831                                               |
| Refinement method                                | Full-matrix least-squares on F <sup>2</sup>                     | Full-matrix least-squares on F <sup>2</sup>                     |
| Data / restraints / parameters                   | 4872 / 0 / 373                                                  | 3022 / 0 / 224                                                  |
| Goodness-of-fit on F <sup>2</sup>                | 1.023                                                           | 1.037                                                           |
| Final R indices [I>2σ(I)]                        | R1 = 0.0335, wR2 = 0.0809                                       | R1 = 0.0434, wR2 = 0.1223                                       |
| R indices (all data)                             | R1 = 0.0420, wR2 = 0.0859                                       | R1 = 0.0520, wR2 = 0.1374                                       |
| Extinction coefficient                           | n/a                                                             | n/a                                                             |
| Largest diff. peak and hole (e.Å <sup>-3</sup> ) | 0.197 and -0.529                                                | 0.336 and -0.412                                                |



|                                                  | <b>Ni3</b>                                                      | <b>Ni4</b>                                                      |
|--------------------------------------------------|-----------------------------------------------------------------|-----------------------------------------------------------------|
| Empirical formula                                | C <sub>44</sub> H <sub>32</sub> N <sub>6</sub> NiO <sub>2</sub> | C <sub>52</sub> H <sub>52</sub> N <sub>6</sub> NiO <sub>2</sub> |
| Formula weight                                   | 735.46                                                          | 851.70                                                          |
| Temperature (K)                                  | 169.98                                                          | 170.02                                                          |
| Wavelength (Å)                                   | 1.34139                                                         | 1.34139                                                         |
| Crystal system                                   | Monoclinic                                                      | Triclinic                                                       |
| Space group                                      | P 1211                                                          | P-1                                                             |
| a (Å)                                            | 9.8938(18)                                                      | 11.1027(2)                                                      |
| b (Å)                                            | 19.286(3)                                                       | 12.8123(2)                                                      |
| c (Å)                                            | 10.6047(19)                                                     | 16.5909(3)                                                      |
| α (°)                                            | 90                                                              | 68.3340(10)                                                     |
| β (°)                                            | 116.982(13)                                                     | 89.5930(10)                                                     |
| γ (°)                                            | 90                                                              | 74.9630(10)                                                     |
| Volume (Å <sup>3</sup> )                         | 1803.2(6)                                                       | 2107.87(7)                                                      |
| Z                                                | 4                                                               | 2                                                               |
| Density (calculated) (Mg/m <sup>3</sup> )        | 1.355                                                           | 1.342                                                           |
| Absorption coefficient (mm <sup>-1</sup> )       | 3.243                                                           | 2.819                                                           |
| F(000)                                           | 764                                                             | 900                                                             |
| Crystal size (mm <sup>3</sup> )                  | 0.05×0.03×0.02                                                  | 0.12×0.1×0.08                                                   |
| Theta range for data collection (°)              | 4.070 to 55.468                                                 | 4.182 to 54.927                                                 |
| Index ranges                                     | -12≤h≤10, -23≤k≤18, -<br>12≤l≤13                                | -13≤h≤13, -15≤k≤15, -<br>20≤l≤20                                |
| Reflections collected                            | 9115                                                            | 21795                                                           |
| Independent reflections                          | 5790 [R(int) = 0.0800]                                          | 7938 [R(int) = 0.0448]                                          |
| Completeness to theta = 26.000°                  | 99.4 %                                                          | 98.8 %                                                          |
| Absorption correction                            | Semi-empirical from<br>equivalents                              | Semi-empirical from<br>equivalents                              |
| Max. and min. transmission                       | 0.7508 and 0.4792                                               | 0.7508 and 0.6073                                               |
| Refinement method                                | Full-matrix least-squares on F <sup>2</sup>                     | Full-matrix least-squares on F <sup>2</sup>                     |
| Data / restraints / parameters                   | 5790 / 1 / 479                                                  | 7938 / 0 / 550                                                  |
| Goodness-of-fit on F <sup>2</sup>                | 0.921                                                           | 1.068                                                           |
| Final R indices [I>2σ(I)]                        | R1 = 0.0666, wR2 = 0.1530                                       | R1 = 0.0367, wR2 = 0.0985                                       |
| R indices (all data)                             | R1 = 0.1290, wR2 = 0.1858                                       | R1 = 0.0424, wR2 = 0.1022                                       |
| Extinction coefficient                           | n/a                                                             | n/a                                                             |
| Largest diff. peak and hole (e.Å <sup>-3</sup> ) | 0.402 and -0.523                                                | 0.272 and -0.596                                                |

### 3. NMR spectra, GPC curves and DSC curves of NB-HAc copolymers

#### 3.1. Microstructure of NB-HAc copolymer

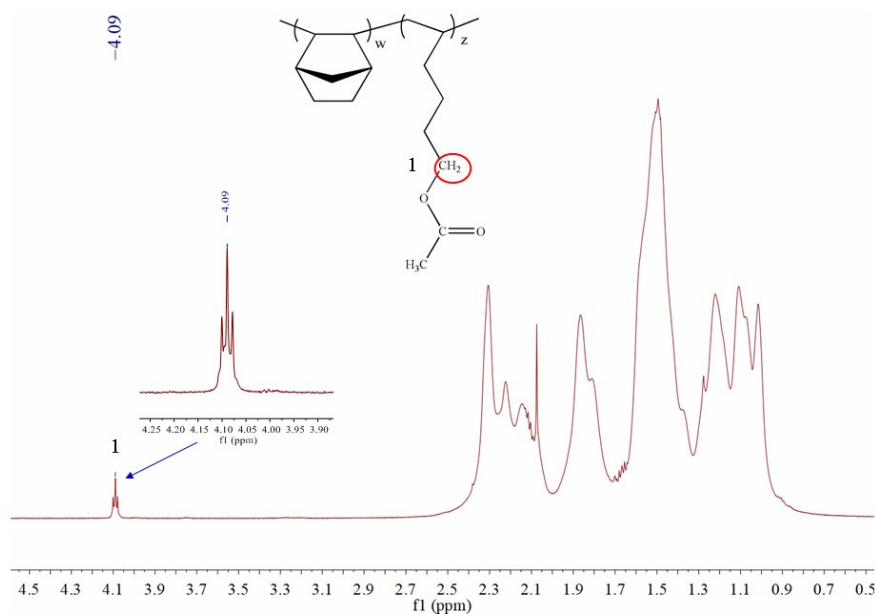

**Figure S2-1.**  $^1\text{H}$  NMR spectra of NB-HAc copolymer obtained by Ni3 with 30 mol% of HAc (Table 2, entry 6)

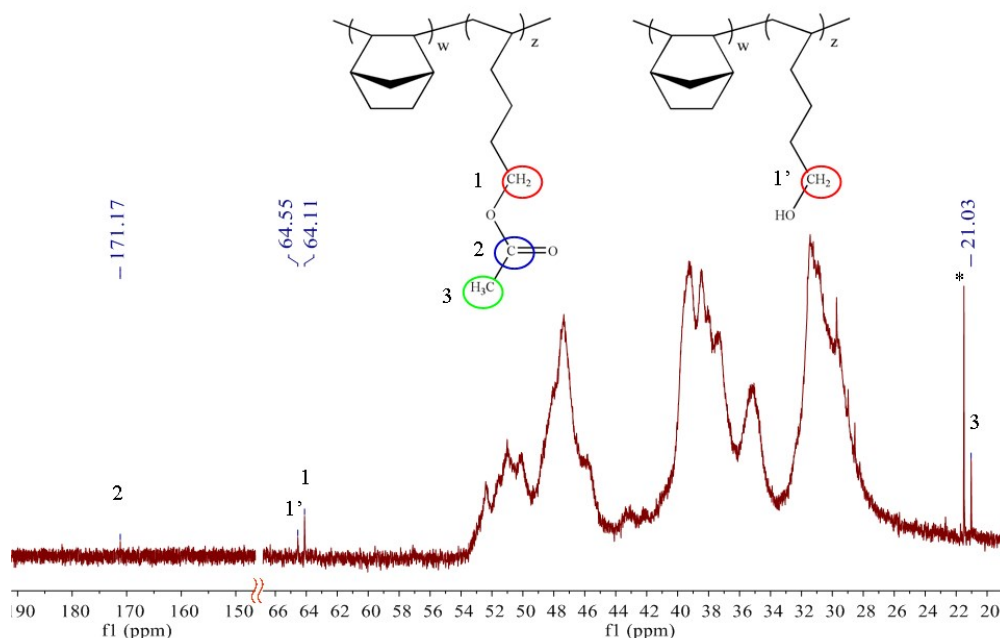

**Figure S2-2.**  $^{13}\text{C}$  NMR spectra of NB-HAc copolymer obtained by Ni3 with 30 mol% of HAc (Table 2, entry 6) (\*-methyl in toluene).

Around 10 mol% hydroxyl groups were formed by the hydrolysis of the ester groups in the work-up process, which includes a treatment of 10% HCl solution of ethanol.

### 3.2. HAc incorporation in NB-HAc copolymers obtained by Ni1-Ni4

The incorporation (mol%) of HAc in the copolymer:

$$x = \frac{\frac{I_a}{2}}{\frac{I_a}{2} + \frac{I_b \times \frac{I_a}{2}}{10}} \times 100\% = \frac{5I_a}{I_b \times I_a} \times 100\%$$

$I_a$  – The integration of methylene ( $-\text{CH}_2-\text{O}-$ ) in HAc units;

$I_b$  – The integration of aliphatic-H in the NB-HAc copolymer.

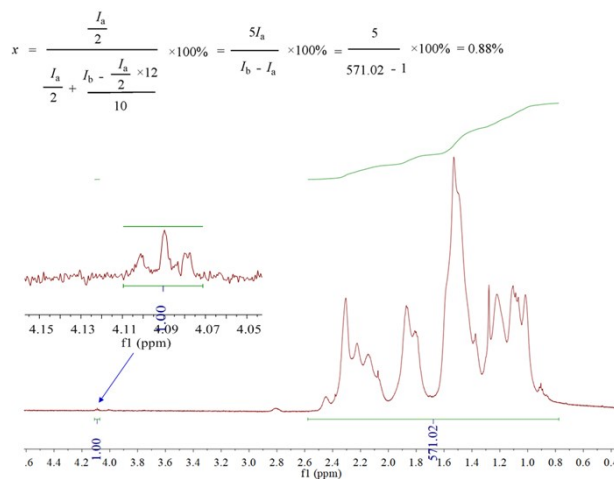

**Figure S2-3.** HAc incorporation in NB-HAc copolymer obtained by Ni1 with 5 mol% of HAc (Table 2, entry 1)

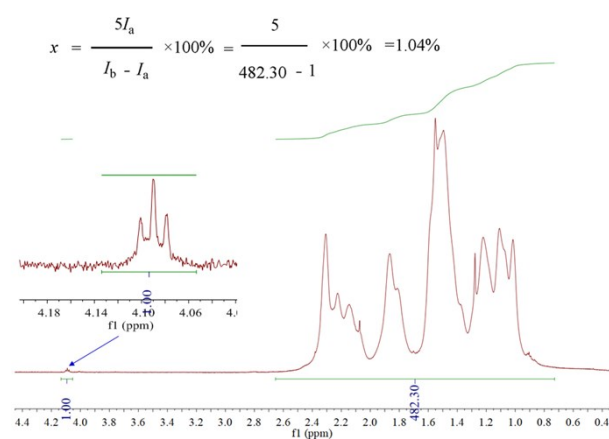

**Figure S2-4.** HAc incorporation in NB-HAc copolymer obtained by Ni2 with 10 mol% of HAc (Table 2, entry 2)

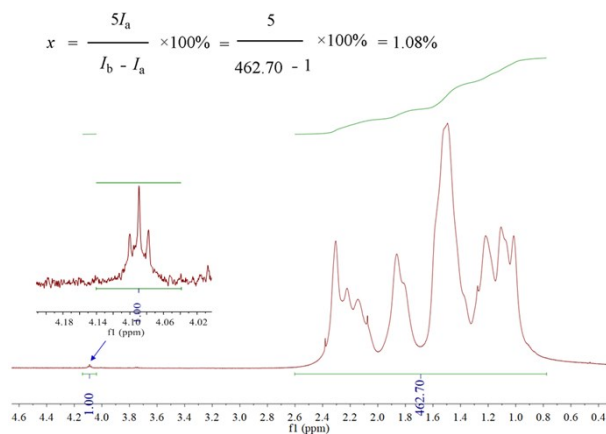

**Figure S2-5.** HAc incorporation in NB-HAc copolymer obtained by **Ni3** with 10 mol% of HAc (Table 2, entry 3)

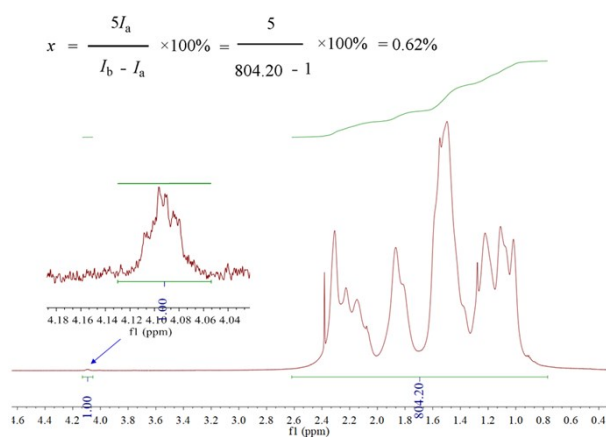

**Figure S2-6.** HAc incorporation in NB-HAc copolymer obtained by **Ni4** with 10 mol% of HAc (Table 2, entry 4)

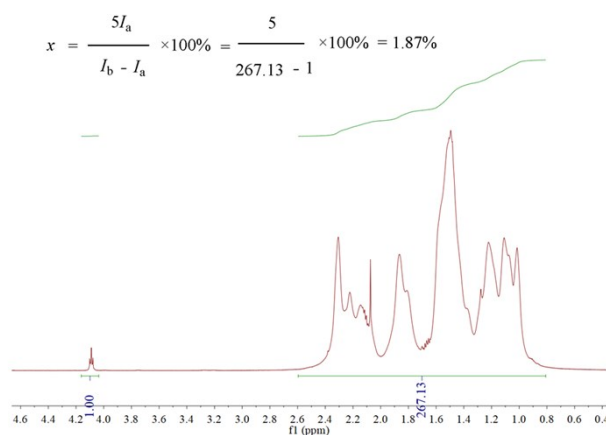

**Figure S2-7.** HAc incorporation in NB-HAc copolymer obtained by **Ni3** with 20 mol% of HAc (Table 2, entry 5)

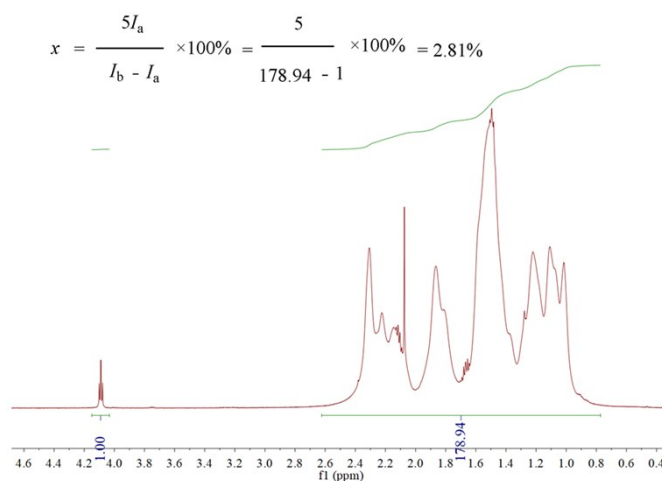

**Figure S2-8.** HAc incorporation in NB-HAc copolymer obtained by **Ni3** with 30 mol% of HAc (Table 2, entry 6)

### 4.3. GPC curves of NB-HAc copolymers

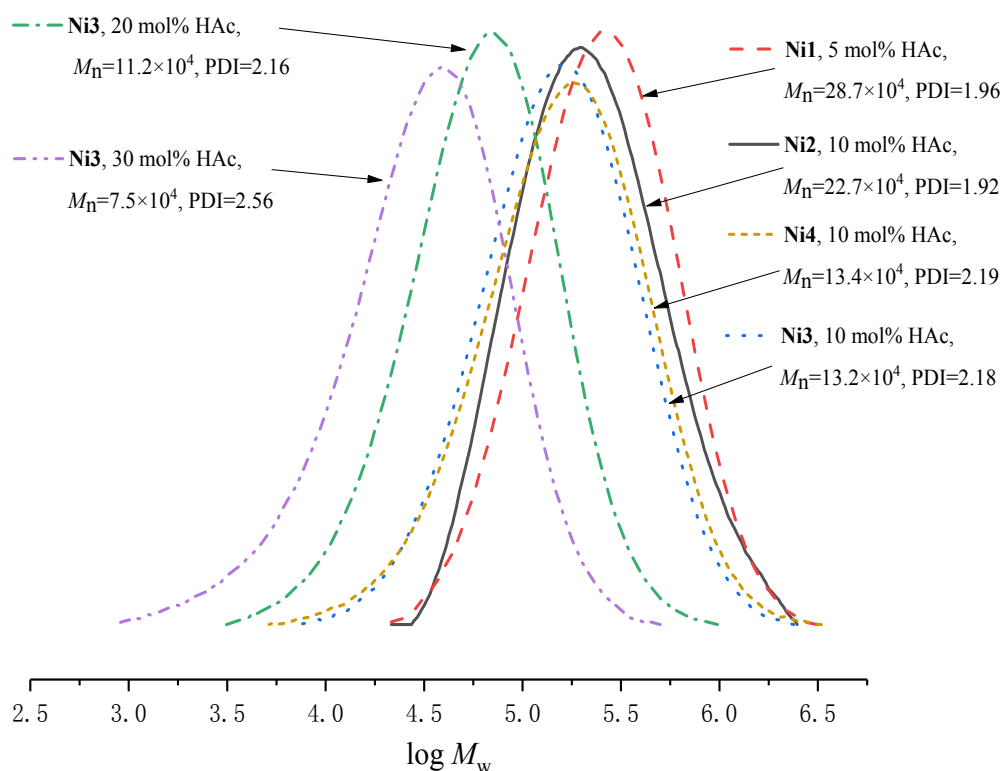

**Figure S2-9.** GPC curves of NB-HAc copolymers obtained by **Ni1-Ni4**

### 3.4. DSC curves of NB-HAc copolymers

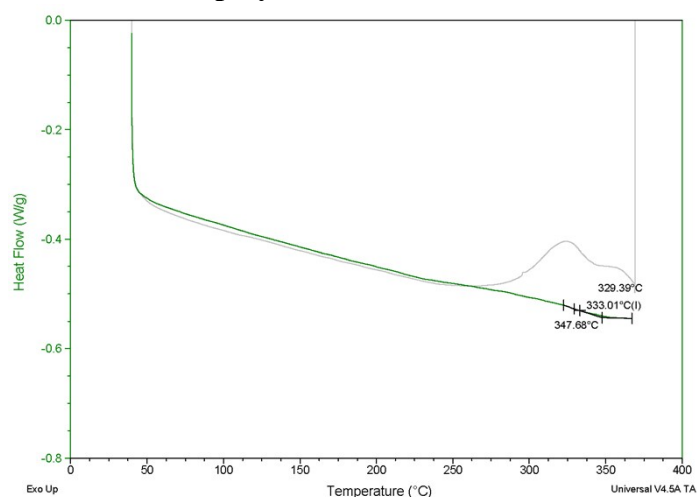

**Figure S2-10.** DSC curve of NB-HAc copolymer obtained by Ni1 with 5 mol% of HAc (Table 2, entry 1)

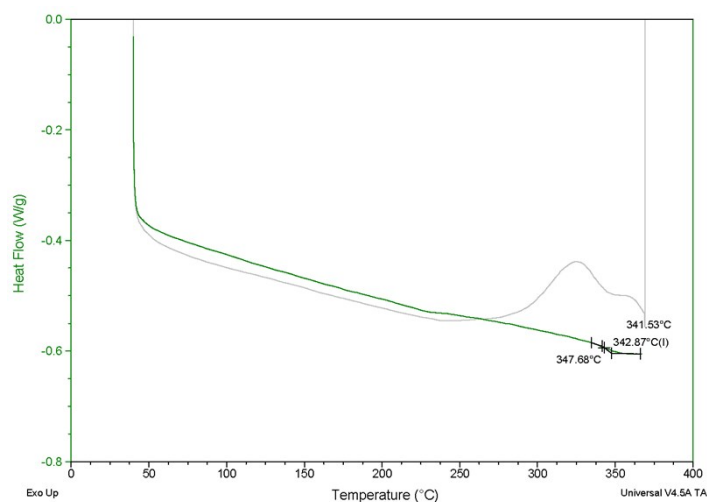

**Figure S2-11.** DSC curve of NB-HAc copolymer obtained by Ni2 with 10 mol% of HAc (Table 2, entry 2)

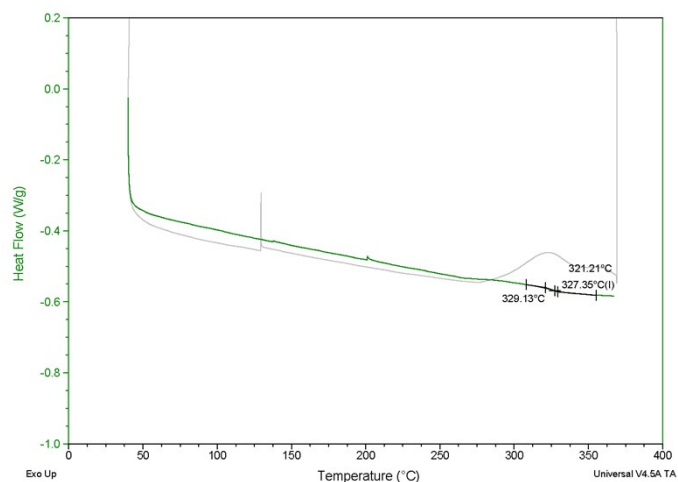

**Figure S2-12.** DSC curve of NB-HAc copolymer obtained by Ni3 with 10 mol% of HAc (Table 2, entry 3)

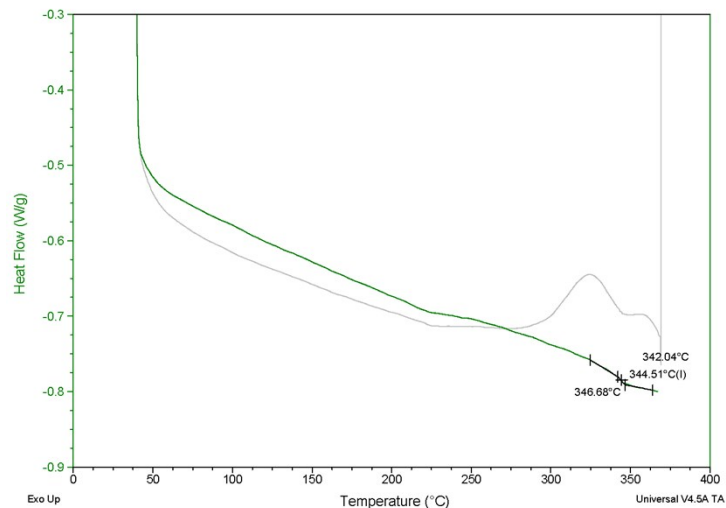

**Figure S2-13.** DSC curve of NB-HAc copolymer obtained by **Ni4** with 10 mol% of HAc (Table 2, entry 4)

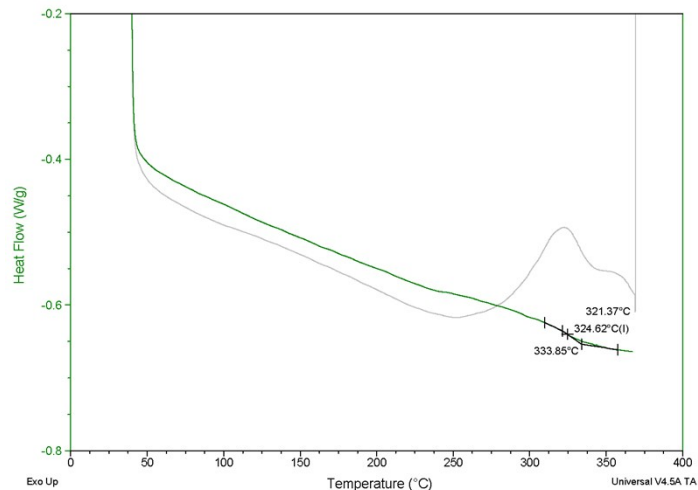

**Figure S2-14.** DSC curve of NB-HAc copolymer obtained by **Ni3** with 20 mol% of HAc (Table 2, entry 5)

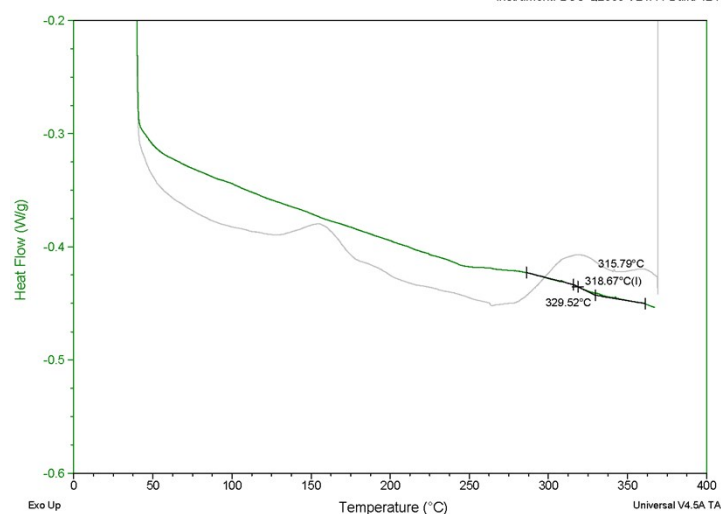

**Figure S2-15.** DSC curve of NB-HAc copolymer obtained by **Ni3** with 30 mol% of HAc (Table 2, entry 6)

## 4. NMR spectra, GPC curves and DSC curves of NB-AAc copolymers

### 4.1. Microstructure of NB-AAc copolymer

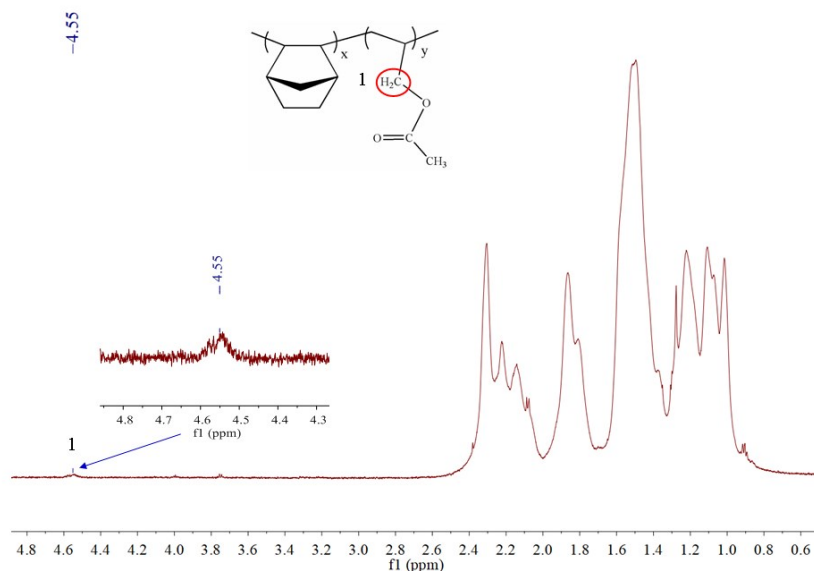

**Figure S3-1.**  $^1\text{H}$  NMR spectra of NB-AAc copolymer obtained by **Ni3** with 20 mol% of AAc (Table 2, entry 12)

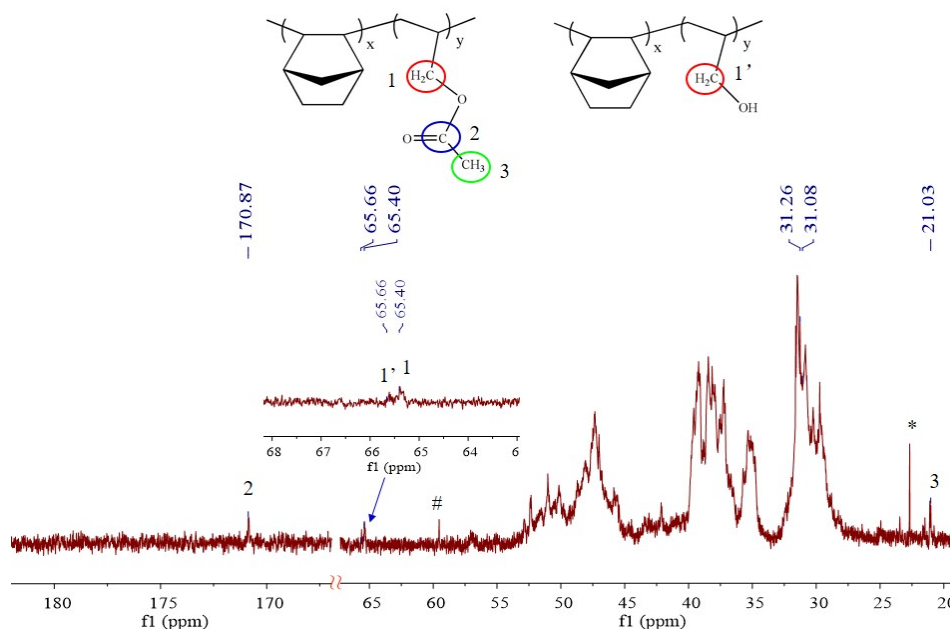

**Figure S3-2.**  $^{13}\text{C}$  NMR spectra of NB-AAc copolymer obtained by **Ni3** with 20 mol% of AAc (Table 2, entry 12) (\* – methyl in toluene; # – methylene in ethanol). The hydroxyl groups were formed by the hydrolysis of the ester groups in the work-up process, which includes a treatment of 10% HCl solution of ethanol.



## 4.2. AAc incorporation in NB-AAc copolymers obtained by Ni1-Ni4

The incorporation (mol%) of AAc in the copolymer:

$$x = \frac{\frac{I_a}{2}}{\frac{I_a}{2} + \frac{I_b \times 6}{10}} \times 100\% = \frac{5I_a}{I_b + 2I_a} \times 100\%$$

$I_a$  – The integration of methylene ( $-\text{CH}_2\text{-O}-$ ) in AAc units;

$I_b$  – The integration of aliphatic-H in the NB-AAc copolymer.

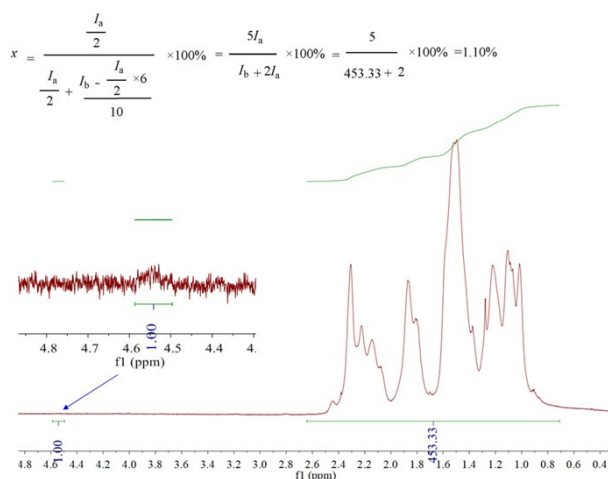

**Figure S3-3.** AAc incorporation in NB-AAc copolymer obtained by Ni1 with 5 mol% of AAc (Table 2, entry 8)

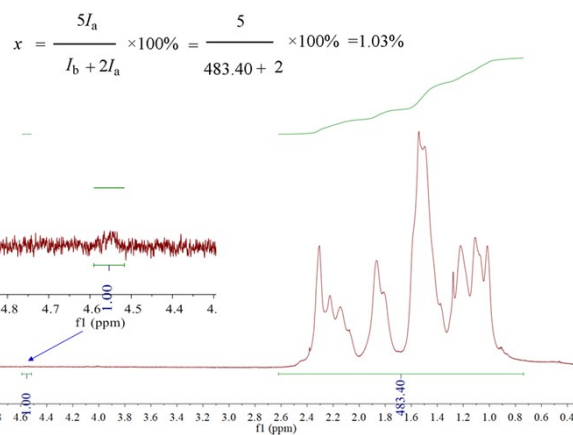

**Figure S3-4.** AAc incorporation in NB-AAc copolymer obtained by Ni2 with 5 mol% of AAc (Table 2, entry 9)

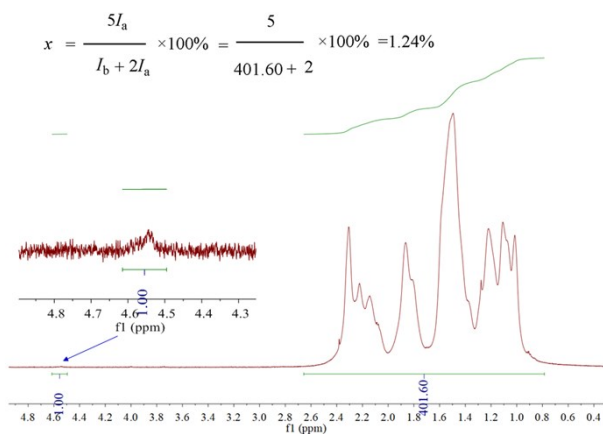

**Figure S3-5.** AAc incorporation in NB-AAc copolymer obtained by **Ni3** with 5 mol% of AAc (Table 2, entry 10)

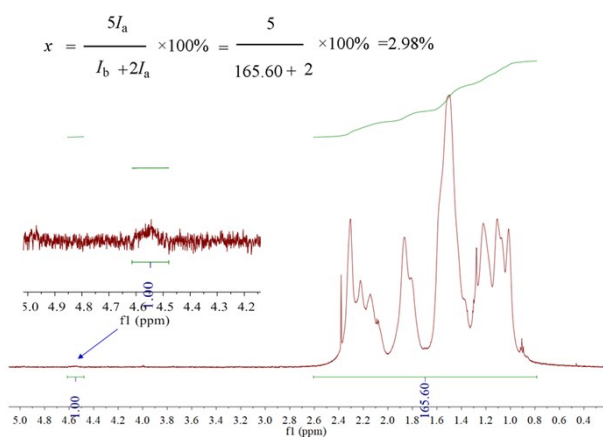

**Figure S3-6.** AAc incorporation in NB-AAc copolymer obtained by **Ni3** with 10 mol% of AAc (Table 2, entry 11)

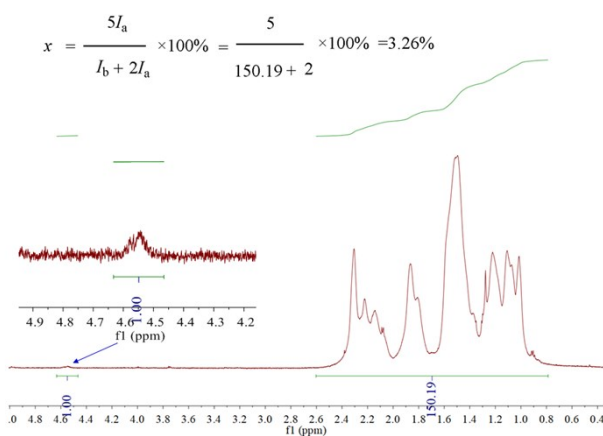

**Figure S3-7.** AAc incorporation in NB-AAc copolymer obtained by **Ni3** with 20 mol% of AAc (Table 2, entry 12)

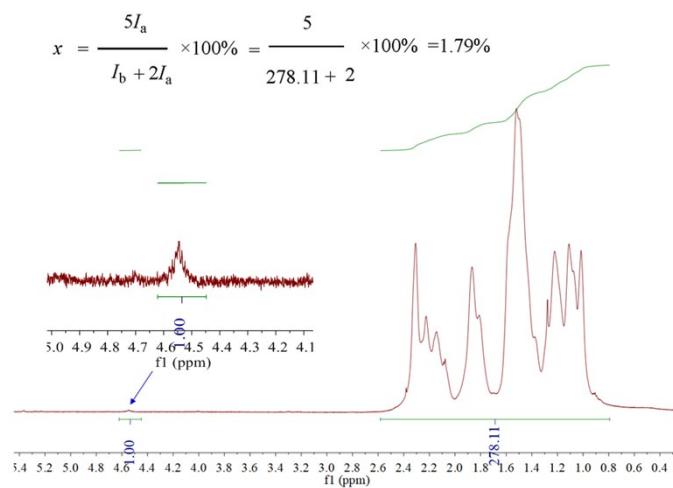

**Figure S3-8.** AAc incorporation in NB-AAc copolymer obtained by **Ni4** with 42 mol% of AAc (Table 2, entry 13)

### 4.3. GPC curves of NB-AAc copolymers

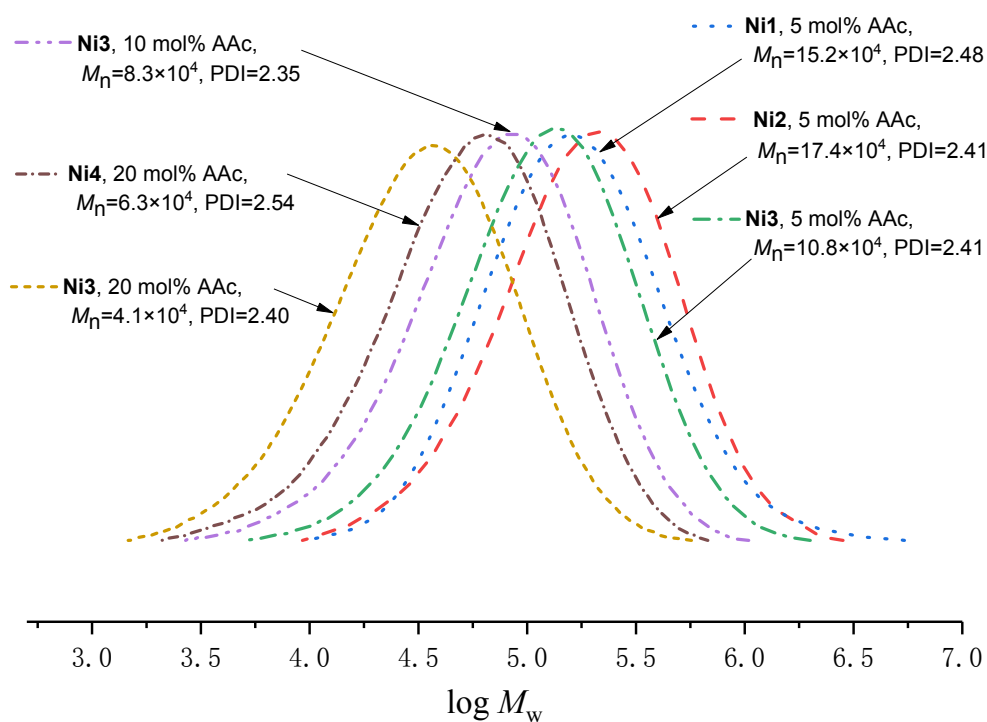

**Figure S3-9.** GPC curves of NB-AAc copolymers obtained by **Ni1-Ni4**

#### 4.4. DSC curves of NB-AAc copolymers

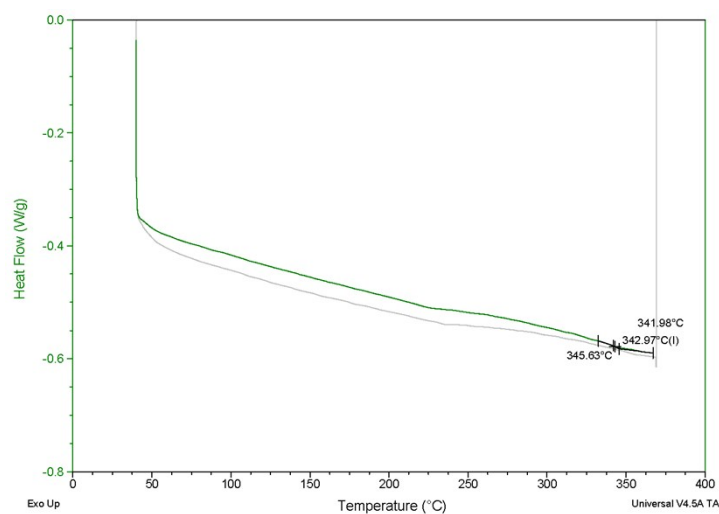

**Figure S3-10.** DSC curve of NB-AAc copolymer obtained by Ni with 5 mol% of AAc (Table 2, entry 8)

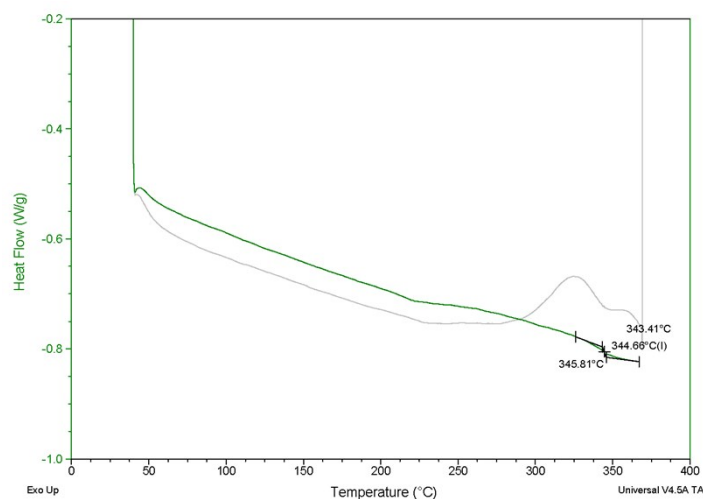

**Figure S3-11.** DSC curve of NB-AAc copolymer obtained by Ni2 with 5 mol% of AAc (Table 2, entry 9)

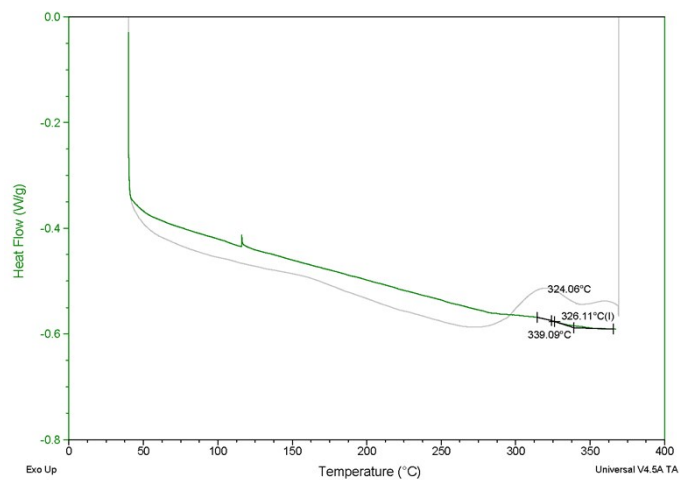

**Figure S3-12.** DSC curve of NB-AAc copolymer obtained by Ni3 with 5 mol% of AAc (Table 2, entry 10)

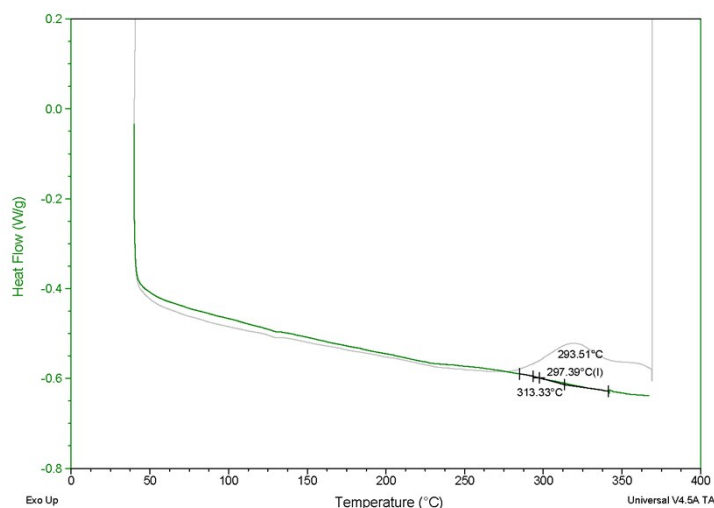

**Figure S3-13.** DSC curve of NB-AAc copolymer obtained by **Ni3** with 10 mol% of AAc (Table 2, entry 11)

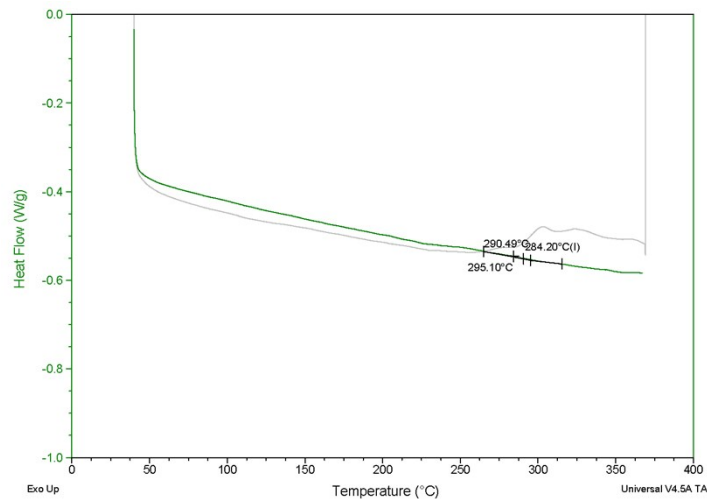

**Figure S3-14.** DSC curve of NB-AAc copolymer obtained by **Ni3** with 20 mol% of AAc (Table 2, entry 12)

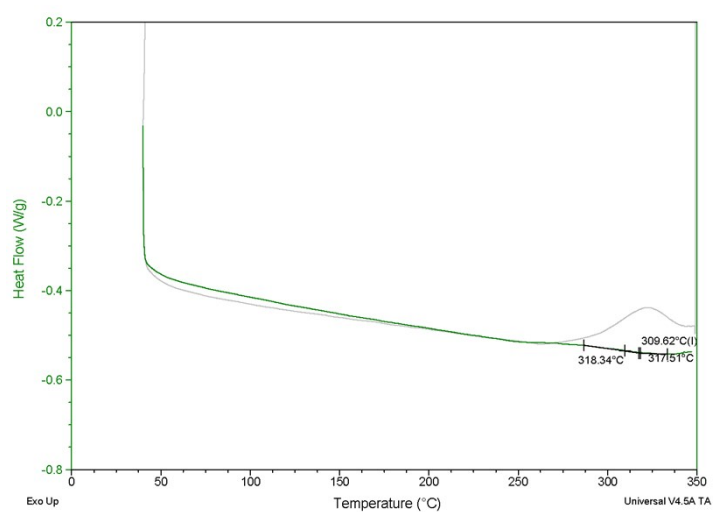

**Figure S3-15.** DSC curve of NB-AAc copolymer obtained by **Ni4** with 20 mol% of AAc (Table 2, entry 13)

## 5. NMR spectra, GPC curves and DSC curves of NB-MA copolymers

### 5.1. Microstructure of NB-MA copolymer

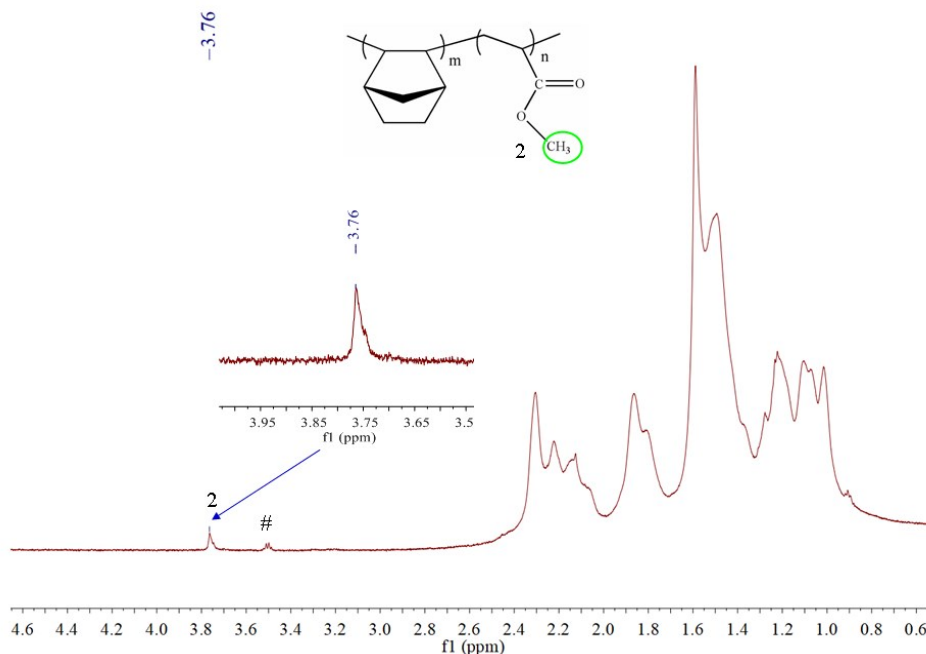

**Figure S4-1.** <sup>1</sup>H NMR spectra of NB-MA copolymer obtained by Ni3 with 10 mol% of MA (Table 2, entry 18) (# – methylene in ethanol)

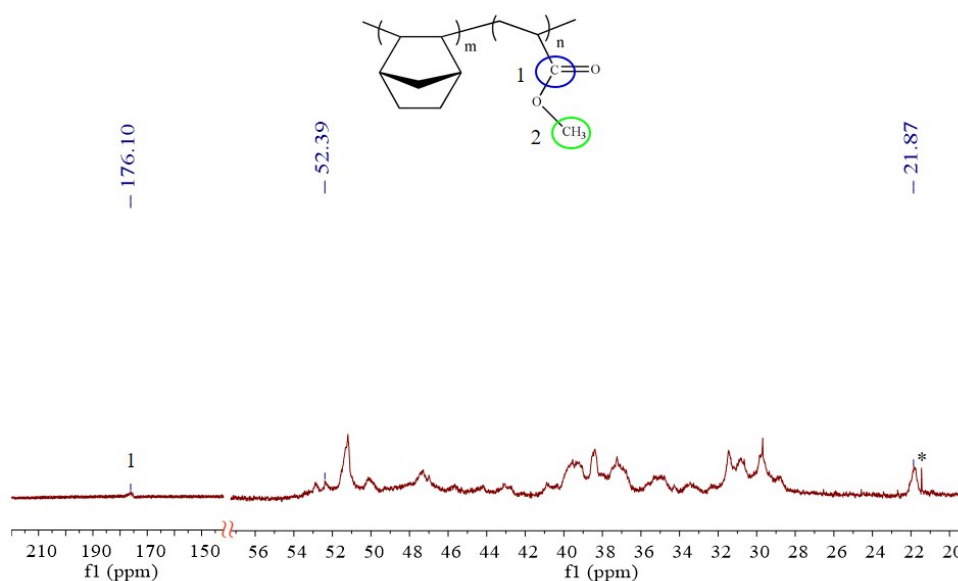

**Figure S4-2.** <sup>13</sup>C NMR spectra of NB-MA copolymer obtained by Ni3 with 10 mol% of MA (Table 2, entry 18) (\* – methyl in toluene)

## 5.2. MA incorporation in NB-MA copolymers obtained by Ni1-Ni4

The incorporation (mol%) of MA in the copolymer:

$$x = \frac{\frac{I_a}{3}}{\frac{I_a}{3} + \frac{I_b \times \frac{I_a}{3} \times 3}{10}} \times 100\% = \frac{10I_a}{3I_b + 7I_a} \times 100\%$$

$I_a$  – The integration of methyl group (-OCH<sub>3</sub>) in MA units;

$I_b$  – The integration of aliphatic-H in the NB-MA copolymer.

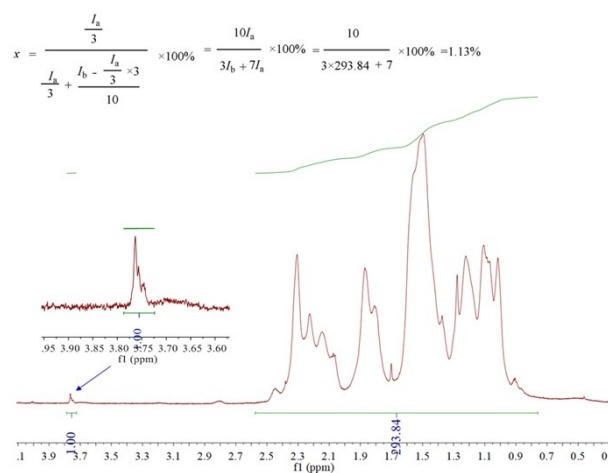

**Figure S4-3.** MA incorporation in NB-MA copolymer obtained by Ni1 with 5 mol% of MA (Table 2, entry 15)

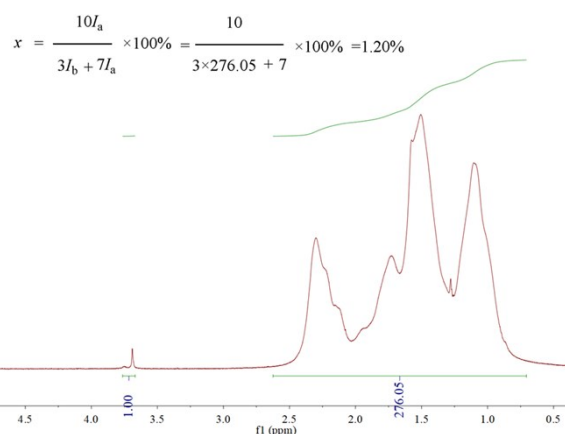

**Figure S4-4.** MA incorporation in NB-MA copolymer obtained by Ni2 with 5 mol% of MA (Table 2, entry 16)

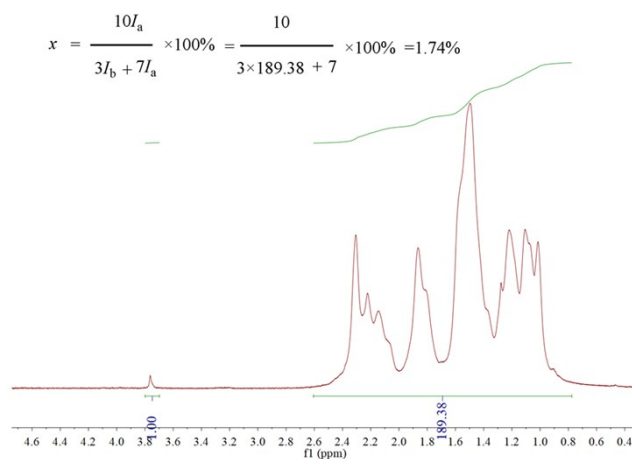

**Figure S4-5.** MA incorporation in NB-MA copolymer obtained by **Ni3** with 5 mol% of MA (Table 2, entry 17)

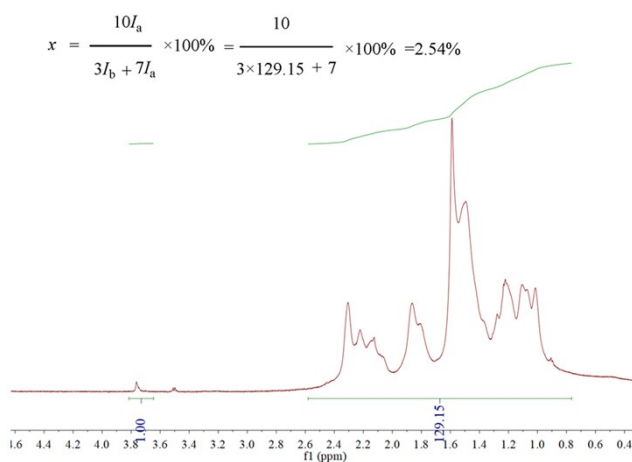

**Figure S4-6.** MA incorporation in NB-MA copolymer obtained by **Ni3** with 10 mol% of MA (Table 2, entry 18)

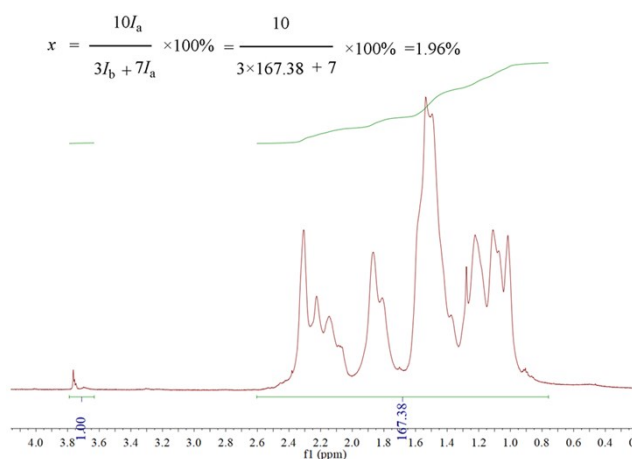

**Figure S4-7.** MA incorporation in NB-MA copolymer obtained by **Ni4** with 10 mol% of MA (Table 2, entry 19)



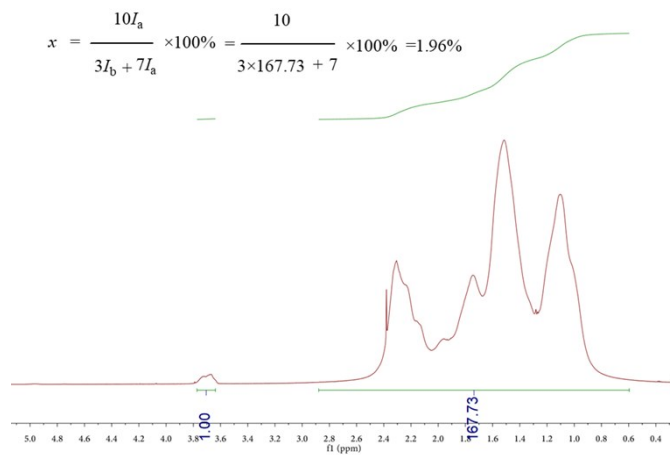

**Figure S4-8.** MA incorporation in NB-MA copolymer obtained by **Ni3** with 5 mol% of MA (60 °C, Table 2, entry 21)

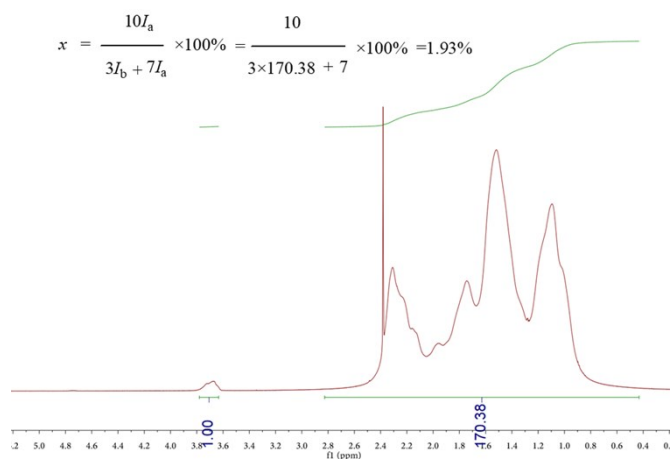

**Figure S4-9.** MA incorporation in NB-MA copolymer obtained by **Ni3** with 5 mol% of MA (80 °C, Table 2, entry 22)

### 5.3. GPC curves of NB-MA copolymers

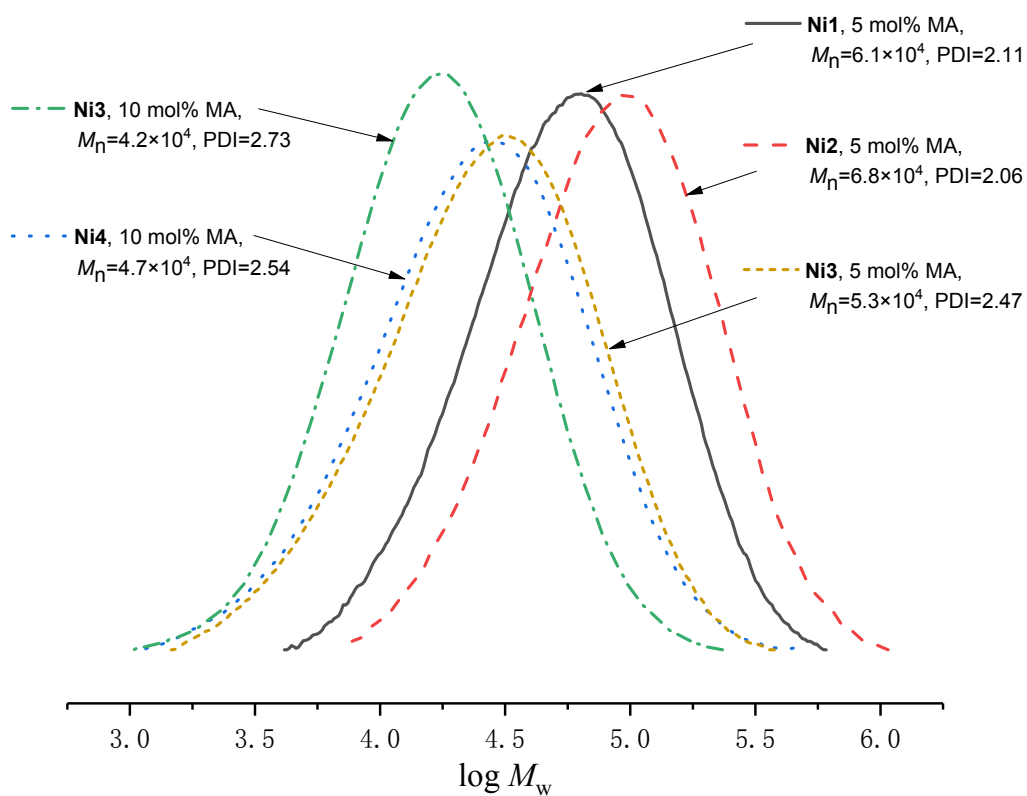

Figure S4-10. GPC curves of NB-MA copolymers obtained by Ni1-Ni4

### 5.4. DSC curves of NB-MA copolymers

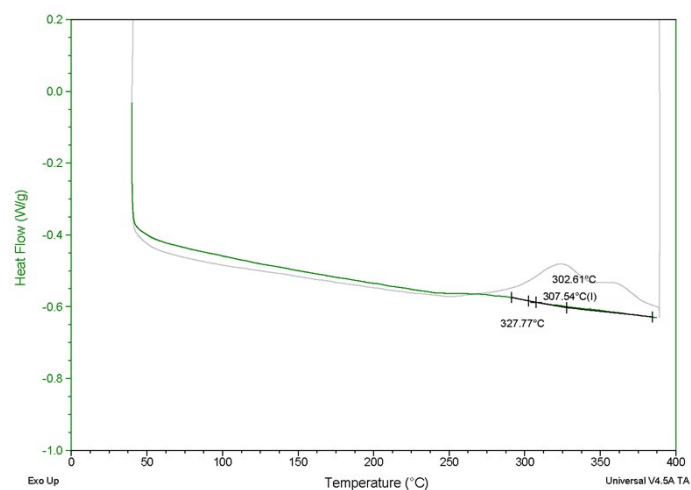

Figure S4-11. DSC curve of NB-MA copolymer obtained by Ni1 with 5 mol% of MA (Table 2, entry 15)

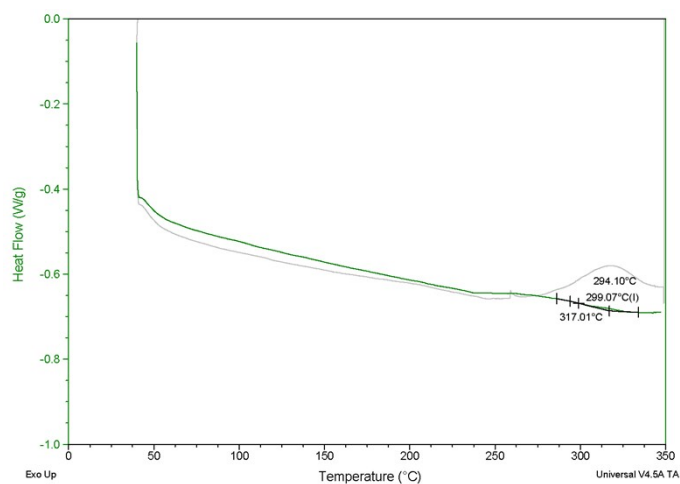

**Figure S4-12.** DSC curve of NB-MA copolymer obtained by **Ni2** with 5 mol% of MA (Table 2, entry 16)

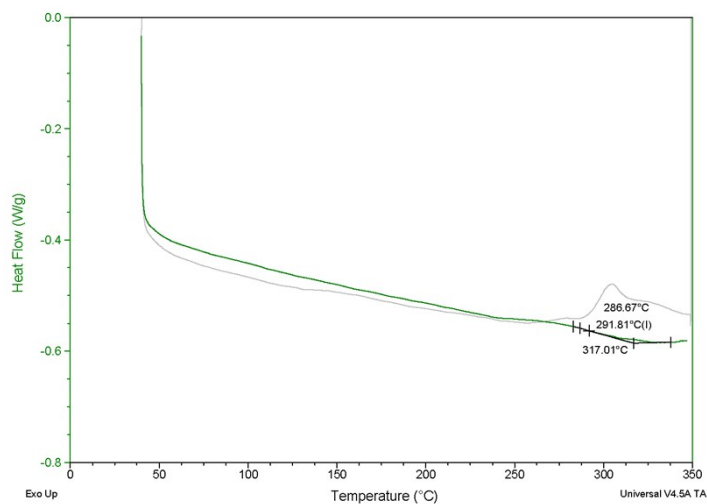

**Figure S4-13.** DSC curve of NB-MA copolymer obtained by **Ni3** with 5 mol% of MA (Table 2, entry 17)

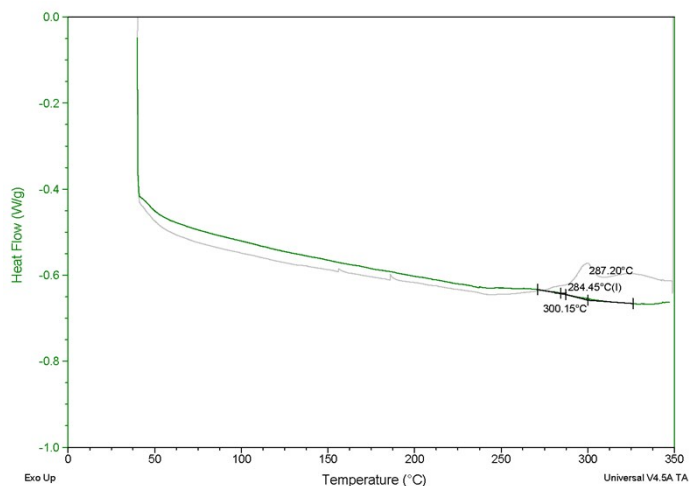

**Figure S4-14.** DSC curve of NB-MA copolymer obtained by **Ni3** with 10 mol% of MA (Table 2, entry 18)

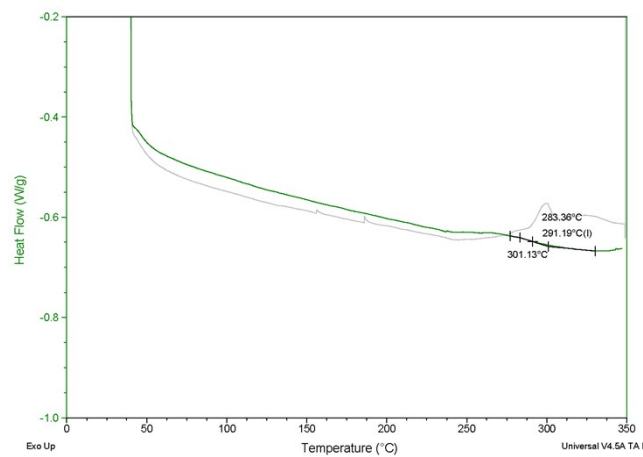

**Figure S4-15.** DSC curve of NB-MA copolymer obtained by **Ni4** with 10 mol% of MA (Table 2, entry 19)
